# Supplementary material for: Associations between physical function and depression in nursing home residents with mild and moderate dementia: a cross-sectional study
Source: PubMed Central journal article supplement — BMJ Open. 2017 Jul 20;7(7):e016875. doi: 10.1136/bmjopen-2017-016875 (PMC5541615; doi:10.1136/bmjopen-2017-016875), 2017-07-20
Supplement: bmjopen-2017-016875.draft_revisions.pdf [file bmjopen-2017-016875.draft_revisions.pdf]

# BMJ Open

## Associations Between Physical Function and Depression in Nursing Home Residents with Mild and Moderate Dementia: A cross-sectional study

|                                 |                                                                                                                                                                                                                                                                                                                                                                                                                                                                                                                                            |
|---------------------------------|--------------------------------------------------------------------------------------------------------------------------------------------------------------------------------------------------------------------------------------------------------------------------------------------------------------------------------------------------------------------------------------------------------------------------------------------------------------------------------------------------------------------------------------------|
| Journal:                        | <i>BMJ Open</i>                                                                                                                                                                                                                                                                                                                                                                                                                                                                                                                            |
| Manuscript ID                   | bmjopen-2017-016875                                                                                                                                                                                                                                                                                                                                                                                                                                                                                                                        |
| Article Type:                   | Research                                                                                                                                                                                                                                                                                                                                                                                                                                                                                                                                   |
| Date Submitted by the Author:   | 16-Mar-2017                                                                                                                                                                                                                                                                                                                                                                                                                                                                                                                                |
| Complete List of Authors:       | Kvæl, Linda; Oslo and Akershus University College of Applied Sciences, Faculty of Health Sciences, Department of Physiotherapy; Ryen Helsehus / Short-term geriatric rehabilitation, Nursing Home Agency Bergland, Astrid; Oslo and Akershus University College of Applied Sciences, Faculty of Health Sciences, Department of Physiotherapy Telenius, Elisabeth; Oslo and Akershus University College of Applied Sciences, Faculty of Health Sciences, Department of Physiotherapy; Norwegian National Advisory Unit on Ageing and Health |
| <b>Primary Subject Heading</b>: | Geriatric medicine                                                                                                                                                                                                                                                                                                                                                                                                                                                                                                                         |
| Secondary Subject Heading:      | Mental health, Patient-centred medicine, Rehabilitation medicine, Health services research                                                                                                                                                                                                                                                                                                                                                                                                                                                 |
| Keywords:                       | Nursing Home, Dementia < NEUROLOGY, Depression, Physical Function, GERIATRIC MEDICINE, Geriatric Rehabilitation                                                                                                                                                                                                                                                                                                                                                                                                                            |
|                                 |                                                                                                                                                                                                                                                                                                                                                                                                                                                                                                                                            |

SCHOLARONE™  
Manuscripts

only

1  
2  
3  
4  
5  
6  
7  
8  
9  
10  
11  
12  
13  
14  
15  
16  
17  
18  
19  
20  
21  
22  
23  
24  
25  
26  
27  
28  
29  
30  
31  
32  
33  
34  
35  
36  
37  
38  
39  
40  
41  
42  
43  
44  
45  
46  
47  
48  
49  
50  
51  
52  
53  
54  
55  
56  
57  
58  
59  
60

# Associations Between Physical Function and Depression in Nursing Home Residents with Mild and Moderate Dementia: A cross-sectional study

**Linda Aimée Hartford Kvæl<sup>1,2</sup>, Astrid Bergland<sup>1</sup>, Elisabeth Wiken Telenius<sup>1,3</sup>**

- 1 Faculty of Health Sciences, Department of Physiotherapy, Oslo and Akershus  
University College of Applied Sciences, Oslo, Norway
- 2 Ryen Helsehus / Short-term rehabilitation, Nursing Home Agency, Oslo, Norway
- 3 Norwegian National Advisory Unit on Ageing and Health, Vestfold Hospital Trust

## **Corresponding author**

Linda Aimée Hartford Kvæl

Skogvegen 19

2005 Rælingen, Norway

[lindaeriksen@hotmail.com](mailto:lindaeriksen@hotmail.com)

+4740474325

**Word count excluding title page, abstract, references and tables: 4147**

## ABSTRACT

**Objectives:** The primary aim of this study is to describe depression and physical function in nursing home residents with dementia, as well as to examine the associations between depression and balance function, lower limb muscle strength, mobility and activities of daily living. The secondary aim is to examine differences in physical function between the groups classified as depressed and not depressed.

**Design:** The study has a cross-sectional design.

**Setting:** A convenience sample of eighteen nursing homes in, and around, Oslo, Norway participated.

**Participants:** We included 170 nursing home residents aged 60-100 years suffering from mild or moderate degree of dementia (defined by score of 1 or 2 on the Clinical Dementia Rating Scale).

**Outcome Measures:** Assessments used were Cornell Scale for Depression in Dementia (CSDD), Bergs Balance Scale (BBS), "the 6-meter walking test" (walking speed), 30 seconds Chair Stand Test (CST) and the Barthel Index.

**Results:** Nursing home residents with dementia are a heterogeneous group in terms of physical function and depression. By applying the recommended cutoff of  $\geq 8$  on CSDD, 23.5% of the participants were classified as being depressed. The results revealed significant associations between higher scores on the CSDD (indicating more symptoms of depression) and lower scores on BBS (95% CI: -0.12 to -0.02,  $p=0.006$ ), 30 seconds CST (95% CI: -0.54 to -0.07,  $p=0.001$ ) as well as maximum walking speed (95% CI: -4.56 to -0.20,  $p=0.003$ ) (indicating lower level of physical function).

**Conclusion:** Better muscle strength, balance and higher walking speed were significantly associated with less depressive symptoms. These results suggest that interventions aiming to increase physical performance may influence depression in older people who live in nursing homes. Future research should explore this relationship through a person-centered approach.

**Keywords:** Nursing home, dementia, depression, physical function, balance, muscle strength, mobility, walking-speed, activities of daily living.

**Strengths and limitations of this study**

- This study reports important information about the associations between physical function and depression in nursing home residents with dementia.
- The study included a well-defined population of older nursing homes residents with mild and moderate dementia defined by score of 1 or 2 on the Clinical Dementia Rating Scale.
- Measuring instruments employed in this study are standardized and commonly used in clinical practice among frail elderly in nursing homes.
- The participants were enrolled in a physical exercise intervention trial (EXDEM), so they were likely to be fitter than the average nursing home population.
- Because of the cross-sectional design of the study we cannot draw conclusions about causality.

## INTRODUCTION

Dementia impact has received increasing attention of governments and politicians across the world in recent years. Societies globally face an increasing proportion of older people who, by reason of age alone, are at increasing risk of dementia.(1) On an international level the prevalence of dementia among older adults in long-term care homes has a median of 58%,(2) but the underdiagnosis of dementia in nursing homes is commonly reported in literature worldwide.(3-5) Approximately 80% of people living in nursing homes in Norway suffer from dementia.(6) The prevalence of depressive disorders among nursing home residents is 10% while the prevalence of depressive symptoms is 29% on an international level.(2) Depression is frequently occurring in nursing home residents with dementia (43%),(7) and is associated with reduced quality of life,(8) poor medical health and more severe cognitive impairment.(9) The World Health Organization (WHO) defines depression as: "a mental disorder, characterized by sadness, loss of interest or pleasure, feelings of guilt or low self-worth, disturbed sleep or appetite, feelings of tiredness and poor concentration".(10) Reduced physical function and dependency in old age as well as somatic disorders are the main risk factors for developing depression.(9, 11) Loneliness and lack of social support are other risk factors.(12-13) Depression is a multifactorial concept and results from a complex interaction of social, psychological and biological factors.(14) According to WHO there are interrelationships between depression and physical health.(15)

Among elderly people in general, better physical function is associated with lower incidence of depressive symptoms.(16-17) It is also related to better mental health, quality of life and wellbeing.(18-19) Despite recommendations of regular physical activity, research shows that nursing home residents are spending most of their time seated or lying down, even when they are capable of independent or assisted activity.(20) It is alarming that residents who are capable of performing ADL activities independently or with assistance, often do not get the opportunity to participate actively, especially since physical function is a modifiable factor reliant on the continuous use of the musculoskeletal system.(21)

It is well known that physical function is modifiable through exercise. Even though the importance of physical activity for the preservation of function in elderly is well documented,(21-28) the relationship between physical function and depression in nursing home residents with dementia is unclear and results from studies are ambiguous. Some studies indicate that nursing home residents with good physical function are less depressed than those

1 with low level of physical function,(8, 29) while others do not find any significant  
2 associations between the two factors.(9)  
3  
4

5  
6 Studies that have investigated the relationship between physical function and depression in  
7 persons with dementia in nursing homes have largely employed proxy-reported measures of  
8 physical function, and not performance-based tests. Performance-based tests are more  
9 sensitive than self- or proxy-reported measures of physical function and may be better to  
10 identify the true abilities of an individual.(30) The relationship between physical function,  
11 tested with performance-based tests, and depression in nursing home residents with dementia  
12 seem to constitute a provisional "gap" in knowledge. The topic is important because  
13 depression in nursing home residents with dementia is common,(31-32) and good alternatives  
14 to psychotropic drugs are called for.(32-34)  
15  
16  
17  
18  
19  
20  
21

22  
23 It is important to identify modifiable factors underlying or associated with depression in the  
24 growing population of nursing home residents with dementia. Therefore, the primary aim of  
25 this study was to describe physical function and depression in this population, as well as to  
26 examine the associations between depression and levels of balance, muscle strength, mobility  
27 and daily life activity. The secondary aim was to examine differences in physical function  
28 between the group classified as depressed and not depressed. Although the authors have an  
29 assumption about relationships, the study is explorative and thus no hypotheses are tested.  
30  
31  
32  
33  
34  
35  
36  
37

## 38 **METHODS**

### 39 **Design**

40 The study has a cross-sectional design. The data were collected from baseline measurements  
41 of a randomized controlled trial (EXDEM) that was carried out in Norway in 2012 and 2013.  
42  
43  
44  
45

### 46 **Setting and Participants**

47 A convenience sample of eighteen nursing homes in Oslo, as well as in the counties of  
48 Akershus, Oppegård and Buskerud participated. We included one hundred and seventy  
49 nursing-home residents. The inclusion criteria were the following: suffering from mild or  
50 moderate degree of dementia (defined by score of 1 or 2 on the Clinical Dementia Rating  
51 Scale),(35) age above 55 years, able to stand up independently or with help from one person,  
52 able to walk six meters with or without a walking aid, and able to give informed consent. The  
53 exclusion criteria were the following: residents suffering from psychosis or severe  
54 communication problems and residents who were medically unstable. The nursing-home  
55  
56  
57  
58  
59  
60

1 employees at participating nursing homes found suitable participants, between six and 12  
2 persons at each nursing home. A total of 182 persons agreed to participate in the study,  
3 however eight changed their mind prior to first assessment and four participants were  
4 excluded because the inclusion criteria were not met.  
5  
6  
7  
8

### 9 **Ethical and legal considerations**

10 Verbal and written information about the study was given to the residents and their family  
11 members by their primary care giver. The participants themselves gave their written consent  
12 to participate in the study and were informed that they could refuse to participate at any stage.  
13 The RCT-study was approved by The Regional Committee for Medical Ethics in south east of  
14 Norway.  
15  
16  
17  
18  
19

### 20 **Measurements**

21 *Depression:* Depression was measured with Cornell Scale for Depression in Dementia  
22 (CSDD), a proxy-rated scale.(36) The informants were caregivers who knew the resident well  
23 and had observed the residents for the last two weeks.(37) CSDD is valid among nursing  
24 home residents with and without dementia, and the reliability is good.(38) The questionnaire  
25 consists of 19 symptom items. Each item is rated from 0 (no symptom) to 2 (severe  
26 symptom), which gives a total range = 0-38 points. The scale allows the entry "not possible to  
27 evaluate".(36) A score of 8 or more on Cornell Depression Scale classified those with  
28 depression.(38)  
29  
30  
31  
32  
33  
34  
35  
36  
37

38 *Balance:* To measure the residents' balance we employed the Berg Balance Scale (BBS), a  
39 widely used performance-based measure of balance. The BBS consists of 14 observable tasks  
40 frequently encountered in everyday life. BBS assesses performance on a 5-level scale from 0  
41 (cannot perform) to 4 (normal performance) on 14 different movement tasks involving  
42 functional balance control, including transfer, stepping and turning.(39) The test is simple and  
43 easy to administer and is safe for the elderly to perform.(40) The total score ranges from 0 to  
44 56 and high score indicates good balance.(41) The scale has shown good intra-rater and inter-  
45 rater reliability when used with an elderly population in Norway.(42-43) In addition  
46 acceptable validity estimates have been reported.(44)  
47  
48  
49  
50  
51  
52  
53

54 *Muscle strength:* Lower limb muscle strength was measured by the 30 seconds Chair Stand  
55 Test (CST), which equals the number of rises from the chair in 30 seconds with arms folded  
56 across the chest.(45) However, in this study the participants were allowed to use the support  
57 of armrest when necessary.(46) The test correlates well with other functional tests such as  
58  
59  
60

1 walking speed, climbing stairs and balance.(40, 47) The 30 seconds Chair Stand Test is a  
2 valid measure of dynamic balance and functional mobility,(48) and good inter-rater reliability  
3 has been reported when used among nursing home residents with mild and moderate  
4 dementia.(43)  
5  
6  
7

8  
9  
10 *Mobility:* Mobility/walking speed was measured by the six-meter walking test. We assessed  
11 both comfortable speed and maximum walking speed, with or without a walking aid, and the  
12 time in seconds was recorded and calculated as meters per second.(49) Good inter-rater  
13 reliability has been demonstrated when used among nursing home residents with mild and  
14 moderate dementia in Norway.(43) Walking speed is regarded as an important measure in  
15 geriatric evaluation.(50)  
16  
17  
18  
19

20  
21 *Activities of daily living:* The Barthel Index (BI) was used to assess ability to perform the  
22 basic Activities of Daily Living (ADL), a widely used measure of ADL function.(51) The  
23 Barthel Index consists of 10 activities focusing on the residents' level of dependence, and the  
24 scores range from 0 (completely dependent) to 20 (independent).(52) The maximum score of  
25 20 implies that the resident independently can attend to personal hygiene, eat, get dressed, go  
26 to the bathroom, walk at least 50 m and use stairs.  
27  
28  
29  
30  
31

32  
33 *Cognition:* Clinical Dementia Rating scale (CDR) was used to rate the severity of cognitive  
34 impairment. It is a six point scale used to characterize domains of cognitive and functional  
35 performance applicable to Alzheimer`s disease and related dementias.(35) Norwegian studies  
36 have shown that Clinical Dementia Rating scale is a valid substitute for a dementia  
37 assessment among nursing home residents to rate dementia and dementia severity.(53-54) The  
38 Norwegian version of Mini Mental State Examination, MMSE-NR, was used to assess global  
39 cognition. MMSE-NR consists of items concerning orientation, word registration and recall,  
40 attention, naming, reading, writing, following commands and figure copying. It can be scored  
41 between 0 and 30. High score indicates better performance.(55-56) CDR is thus a measure to  
42 rate dementia and dementia severity, while MMSE assess global cognition. As the dementia  
43 severity increases, the global cognition performance reduces.  
44  
45  
46  
47  
48  
49  
50  
51

### 52 **Demographic factors**

53 Participants' age and gender, length of stay in a nursing home (from date of admission),  
54 number of drugs, number of chronic disorders (musculoskeletal, neurological, cardiovascular  
55 and psychiatric diagnoses), use of walking aids and the residents' ability to rise from chair  
56  
57  
58  
59  
60



1 independently were registrated. Demographic factors were extracted from the residents'  
2 journals.  
3  
4  
5

### 6 **Procedure**

7 All assessments of physical function were performed by research physiotherapists. To ensure  
8 high inter-rater test reliability the testers took part in a training program on testing procedures  
9 before the study was initiated. The cognitive tests were administered by nursing home staff  
10 who had previous experience in using these tests. The proxy assessments, including CSDD  
11 and Barthel Index, were filled out by nursing home staff who knew the participants well.  
12  
13 Primary caregivers extracted information from the resident records.  
14  
15  
16  
17  
18

### 19 **Statistics**

20 All statistical analyses were conducted with SPSS, Statistical Package for the Social Science,  
21 version 22 for Windows. Data are presented with percentages and proportions for categorical  
22 values and means with standard deviation (SD) for interval data. The t-test was applied for  
23 interval data, and the Chi-square test for categorical data to access statistical differences  
24 between groups. Correlation analyses (Pearsons'  $r$ ) were conducted to examine the  
25 associations between the variables of physical function in order to discover multicollinearity.  
26  
27  
28  
29  
30  
31

32  
33 Linear regression analyses were applied to explore bivariate and multivariate associations  
34 between Cornell Scale score and the independent variables. Each of the univariate regression  
35 models was examined separately to make sure the conditions for linear regression analysis  
36 existed. We analyzed linearity, homoscedasticity and the normal distribution of the residuals  
37 by inspecting Normal Probability Plots, different scatterplots and histograms.(57) Extreme  
38 values were examined in line with Outliers Labeling Tecnique.(58) We identified one extreme  
39 value based on the Cornell sumscore, two based on maximum walking speed and one based  
40 on comfortable walking speed. However, according to Pallant,(57) it is not necessary to  
41 correct for these as long as the numbers are few and the group is large enough. We considered  
42 the group to be large (N=170) and have therefore not adjusted for these in the further  
43 analyses.(57) From the unadjusted linear regression analyses we selected variables having the  
44 strongest association with the outcome ( $p < 0.05$ ) and fitted multiple linear regression models  
45 in addition to the variables of age and gender. Three different multiple linear regression  
46 models were fitted because of high correlation (multicollinearity) between the variables of  
47 physical performance (see table 2). BBS was included in the first model, CST in the second  
48 model and maximum walking speed was included in the third model. This measure was taken  
49 to identify a model that explained the largest proportion of the variance in the Cornell scale.  
50  
51  
52  
53  
54  
55  
56  
57  
58  
59  
60

1 To compare the strength of the associations between the various possible predictors and the  
2 main outcome (Cornell scale), we used the standardized betas from the regression models  
3 with their p-values and the adjusted coefficient of determination ( $R^2$ ).  
4  
5  
6

7 The CSDD is commonly used in nursing homes to distinguish between groups of depressed  
8 and not depressed. This is important in the detection and treatment of depression in persons  
9 with dementia. Because of this clinical relevance we found it necessary to perform logistic  
10 regression analysis to see if the results from logistic regression analysis differed significantly  
11 from the results of linear regression analysis. The odds ratio (OR), based on logistic  
12 regression analysis, showed the strength of association between the groups with and without  
13 depression and physical function. A score of 8 or more on CSDD classified the participants  
14 with depression.<sup>(38)</sup> Two multiple logistic regression models were fitted because of  
15 multicollinearity ( $r = 0.7$ ) between BBS and CST. In the first model BBS was included and in  
16 the second model we included CST, in addition to age and gender. The level of statistical  
17 significance was set at  $p < 0.05$  in all analyses, and all tests were two-tailed.  
18  
19  
20  
21  
22  
23  
24  
25  
26  
27  
28  
29

## 30 RESULTS

31 *Sample characteristics:* Characteristics for whole sample, depressed and not depressed  
32 participants are shown in table 1. Of the 170 nursing home residents with dementia, 73.5%  
33 were woman with a mean age of 88.2 years. The mean duration of stay in nursing home for  
34 the whole sample was 2 years and 2 months, the depressed participants' stay were  
35 approximately four months longer.  
36  
37  
38  
39  
40

41 About 50% of the participants suffered from cardiovascular disease and almost one in four  
42 had a psychiatric diagnosis. Further approximately 40% was diagnosed with a  
43 musculoskeletal diagnosis and about one in three suffered from a neurological condition. The  
44 depressed participants had significantly more psychiatric diagnoses than the not depressed ( $p$   
45 = 0.02). Approximately 10% of the nursing home residents with dementia used a wheelchair,  
46 and 50% used a zimmer frame.  
47  
48  
49  
50  
51  
52  
53  
54  
55  
56  
57  
58  
59  
60

Table 1: Characteristics for whole sample, depressed participants (Cornell Cutoff  $\geq 8$ ) and not depressed participants

|                                                                    | Number of registered (n) | Whole sample (N=170) | Range (min-max) | Depressed (n = 38) | Not depressed (n = 124) | p-value |
|--------------------------------------------------------------------|--------------------------|----------------------|-----------------|--------------------|-------------------------|---------|
| Gender, women, n (%) #                                             | 170                      | 125 (73.5)           | **              | 29 (76.3)          | 90 (72.6)               | 0.65    |
| Age in years, mean (SD)                                            | 169                      | 86.9 (7.4)           | 60 – 100        | 86.1 (7.6)         | 86.7 (7.5)              | 0.85    |
| Duration of stay in nursing home (months), mean (SD)               | 154                      | 25.7 (24.5)          | 3 - 199         | 28.7 (23.9)        | 25 (25.3)               | 0.43    |
| Number of chronic disorders, mean (SD)                             | 142                      | 3.4 (1.9)            | 0 - 11          | 3.9 (2.3)          | 3.3 (1.8)               | 0.09    |
| Number of drugs, mean (SD)                                         | 142                      | 6.4 (3.4)            | 0 - 21          | 7.3 (3.5)          | 6.1 (3.3)               | 0.09    |
| Use of walking aid, n (%) #                                        | 170                      | 118 (69.4)           | **              | 29 (76.3)          | 83 (66.9)               | 0.27    |
| Able to rise from chair independently, n (%) #                     | 168                      | 158 (92.9)           | **              | 33 (86.8)          | 118 (95.2)              | 0.04*   |
| Mini-Mental State Examination score in points, mean (SD)           | 147                      | 15.6 (4.9)           | 2 - 28          | 15.6 (5.2)         | 15.7 (4.9)              | 0.86    |
| Berg Balance Scale in points, mean (SD)                            | 166                      | 34.7 (14.0)          | 3 - 56          | 29.6 (15.7)        | 36 (13.3)               | 0.03*   |
| Bergs Cutoff 45, number in risk of falling, n (%) # $\alpha$       | 166                      | 115 (67.6)           | **              | 29 (76.3)          | 82 (66.1)               | 0.32    |
| 30 Seconds Chair Stand Test, number of rises from chair, mean (SD) | 167                      | 6.1 (3.0)            | 0 - 14          | 5.0 (3.0)          | 6.4 (3.0)               | 0.02*   |
| Comfortable walking speed in m/s, mean (SD)                        | 166                      | 0.5 (0.2)            | 0.1 – 1.4       | 0.4 (0.2)          | 0.5 (0.2)               | 0.32    |
| Maximum walking speed in m/s, mean (SD)                            | 166                      | 0.8 (0.3)            | 0.1 – 2.1       | 0.7 (0.3)          | 0.8 (0.3)               | 0.08    |
| Barthel Index in points, mean (SD)                                 | 162                      | 13.5 (3.5)           | 5 - 20          | 12.7 (3.3)         | 13.7 (3.6)              | 0.13    |
| Cornell Scale for Depression in Dementia, mean (SD)                | 162                      | 4.9 (4.6)            | 0 - 21          | 11.7 (3.6)         | 2.8 (2.1)               | 0.000*  |

Explanation of table: SD = Standard deviation, Min = minimum value, Max = maximum value, n = number of registered, N = whole sample, p = Significance level based on Independent-samples T-test between depressed and not depressed (# = Significance level based on Chi-Square-Test), \* =  $p < 0.05$ , \*\* = range as a measure is not applicable since the variable represents categorical data, gender (1 = female and 2 = male), age expressed in years, length of nursing home stay in months, diagnoses and medications given in number, the use of walking aids (0 = no and 1 = yes), able to rise from chair independently (0 = no and 1 = yes), MMSE = Mini Mental State Examination: range 0-30; low score indicates poor cognitive function, Bergs Balance Test: range 0-56; high score indicates good balance,  $\alpha$  = number in risk of falling (0 = no, score  $\geq 45$  and 1 = yes, score  $< 45$ ), (39) 30 seconds Chair Stand Test: number of rises from chair within 30 sec., comfortable and maximum walking speed in m/s; high score on the physical tests are positive (better physical function), Barthel ADL Index: range 0-20; high score indicates dependency, Cornell Scale for Depression in Dementia: range 0-38; high score indicates more depressive symptoms (0 = not depressed: Cornell score  $< 8$ , 1 = depressed: Cornell score  $\geq 8$ )

1  
2  
3  
4  
5  
6  
7  
8  
9  
10  
11  
12  
13  
14  
15  
16  
17  
18  
19  
20  
21  
22  
23  
24  
25  
26  
27  
28  
29  
30  
31  
32  
33  
34  
35  
36  
37  
38  
39  
40  
41  
42  
43  
44  
45  
46  
47  
48  
49  
50  
51  
52  
53  
54  
55  
56  
57  
58  
59  
60

*Cognition:* Regarding cognition the participants' scores on the Mini Mental State Examination ranged from 2 to 28 points. A total of 88.7% of the participants' MMSE scores fell within mild and moderate dementia (10-26 points), (59) 16 (10.9%) scored less than 10 points (indicating severe dementia) and 1.4% scored higher than 26 points. Only 60% (n=101) of the participants had a pre-existing dementia diagnosis; 25 were diagnosed with Alzheimer's disease, 22 with vascular dementia, one with subcortical dementia and one with frontotemporal dementia. A group of 52 participants did not have a specific diagnosis but were suffering from dementia according to medical records.

*Depression:* The score on CSDD ranged from 0 (n = 20) to 21 (n = 1) points. The mean value for the whole sample was 4.9 points, and no significant gender difference was observed regarding CSDD (p = 0.45). By applying the recommended cutoff of  $\geq 8$  on CSDD, (38) 23.5% (n=38) of the participants were classified as being depressed, and 29 (76.3%) of them were women. The participants classified as not depressed were significantly better to rise from chair independently (p=0.04). The number of chronic diseases ranged between 0 and 11, the mean number was 3.4 diagnoses (SD = 1.9), and the average number of medications was 6.4 (SD = 3.4). There was a statistical trend (p < 0.10) that participants classified as depressed had more diagnoses and used more medications than the participants in the group without depression.

*Physical function:* Regarding the physical performance assessments, the mean values of the tests and standard deviations are shown in table 1. The mean score on BBS was 34.7 for the whole sample, and the scores ranged from 3 to 56 points. On average, the participants were able to stand up 6 times in 30 seconds and mean maximum walking speed was 0.8 m/s. The participants classified as depressed had significantly lower score on Bergs Balance Scale (p=0.03) and 30 seconds Chair Stand Test (p=0.02), indicating poorer balance function and lower limb strength compared to those without depression (Table 1). The associations between the different variables of physical function are shown in table 2. The highest correlation was found between BBS, CST and maximum walking speed, which had consequences for the further analyses (see statistics).

Table 2: Correlations between the different physical function measures and CSDD  
(The Pearsons Correlation Co-efficients)

|                                                 | <b>Bergs<br/>Balance Test<br/>(n=166)</b> | <b>Chair<br/>Stand Test<br/>(n=167)</b> | <b>Comfortable<br/>walking<br/>speed (n=166)</b> | <b>Maximum<br/>walking<br/>speed (n=166)</b> | <b>Barthel<br/>ADL Index<br/>(n=162)</b> |
|-------------------------------------------------|-------------------------------------------|-----------------------------------------|--------------------------------------------------|----------------------------------------------|------------------------------------------|
| <b>Chair Stand Test<br/>(n= 167)</b>            | 0.7<br>(p < 0.01)                         |                                         |                                                  |                                              |                                          |
| <b>Comfortable walking<br/>speed (n=166)</b>    | 0.6<br>(p < 0.01)                         | 0.7<br>(p < 0.01)                       |                                                  |                                              |                                          |
| <b>Maximum walking<br/>speed (n=166)</b>        | 0.7<br>(p < 0.01)                         | 0.7<br>(p < 0.01)                       | 0.8<br>(p < 0.01)                                |                                              |                                          |
| <b>Barthel ADL Index<br/>(n=162)</b>            | 0.7<br>(p < 0.01)                         | 0.6<br>(p < 0.01)                       | 0.5<br>(p < 0.01)                                | 0.6<br>(p < 0.01)                            |                                          |
| <b>Cornell Scale for<br/>Depression (n=162)</b> | -0.2<br>(p < 0.01)                        | -0.2<br>(p = 0.01)                      | -0.12<br>(p = 0.12)                              | -0.2<br>(p = 0.03)                           | -0.13<br>(p = 0.12)                      |

*Association between physical performance and level of depression:*

The unadjusted and adjusted linear regression analyses showed a significant relationship between depressive symptoms (CSDD score) and physical function for the variables measuring balance (BBS), muscle strength (CST) and maximum walking speed. Higher scores on the CST, BBS and maximum walking speed were associated with less depressive symptoms (Table 3).

Furthermore, the unadjusted linear regression analyses provided a statistical trend (p < 0.10) for the association between greater severity of depressive symptoms (Cornell) and more chronic diseases (p=0.09) as well as less ability to rise from chair independently (p=0.07).

1  
2  
3  
4  
5  
6  
7  
8  
9  
10  
11  
12  
13  
14  
15  
16  
17  
18  
19  
20  
21  
22  
23  
24  
25  
26  
27  
28  
29  
30  
31  
32  
33  
34  
35  
36  
37  
38  
39  
40  
41  
42  
43  
44  
45  
46  
47  
48  
49

Table 3: Unadjusted and adjusted linear regression analyses of the associations between Cornell (dependent variable) and variables measuring demographic factors, cognitive and physical performance

| Independent variables                                  | Unadjusted analysis |         |                               |             | Adjusted analysis Model 1<br><i>R</i> <sup>2</sup> = .033 |                               |             | Adjusted analysis Model 2<br><i>R</i> <sup>2</sup> = .025 |                               |             | Adjusted analysis Model 3<br><i>R</i> <sup>2</sup> = .015 |                               |             |
|--------------------------------------------------------|---------------------|---------|-------------------------------|-------------|-----------------------------------------------------------|-------------------------------|-------------|-----------------------------------------------------------|-------------------------------|-------------|-----------------------------------------------------------|-------------------------------|-------------|
|                                                        | <i>n</i>            | $\beta$ | <i>B</i><br>(95 % <i>CI</i> ) | <i>Sig.</i> | $\beta$                                                   | <i>B</i><br>(95 % <i>CI</i> ) | <i>Sig.</i> | $\beta$                                                   | <i>B</i><br>(95 % <i>CI</i> ) | <i>Sig.</i> | $\beta$                                                   | <i>B</i><br>(95 % <i>CI</i> ) | <i>Sig.</i> |
| Age in years                                           | 170                 | -0.06   | -0.61<br>(-2.21 – 0.99)       | 0.45        | -                                                         | -                             | 0.93        | -                                                         | -                             | 0.82        | -                                                         | -                             | 0.83        |
| Gender (1=women and 2=men)                             | 169                 | 0.05    | 0.03<br>(-0.07 – 0.12)        | 0.56        | -                                                         | -                             | 0.65        | -                                                         | -                             | 0.87        | -                                                         | -                             | 0.82        |
| Duration of stay in nursing home (months)              | 154                 | 0.06    | 0.01<br>(-0.02 – 0.04)        | 0.50        |                                                           |                               |             |                                                           |                               |             |                                                           |                               |             |
| Number of diagnoses                                    | 142                 | 0.15    | 0.35<br>(-0.05 – 0.76)        | 0.09        |                                                           |                               |             |                                                           |                               |             |                                                           |                               |             |
| Number of drugs                                        | 142                 | 0.11    | 0.14<br>(-0.09 – 0.37)        | 0.23        |                                                           |                               |             |                                                           |                               |             |                                                           |                               |             |
| Use of walking aid (0=no and 1=yes)                    | 170                 | 0.10    | 0.97<br>(-0.56 – 2.5)         | 0.21        |                                                           |                               |             |                                                           |                               |             |                                                           |                               |             |
| Able to rise from chair independently (0=no and 1=yes) | 168                 | 0.14    | 2.68<br>(-0.25 – 5.60)        | 0.07        |                                                           |                               |             |                                                           |                               |             |                                                           |                               |             |
| Mine-Mental State Examination (MMSE) in Points         | 147                 | -0.01   | -0.01<br>(-0.17 – 0.15)       | 0.90        |                                                           |                               |             |                                                           |                               |             |                                                           |                               |             |
| Bergs Balance Test (BBS) in Points                     | 166                 | -0.22   | -0.07<br>(-0.12 – -0.02)      | 0.005*      | -0.22                                                     | -0.07<br>(-0.12 – -0.02)      | 0.006*      |                                                           |                               |             |                                                           |                               |             |
| 30 Seconds Chair Stand Test (CST) in number            | 167                 | -0.20   | -0.30<br>(-0.53 – -0.07)      | 0.01*       |                                                           |                               |             | -0.20                                                     | -0.31<br>(-0.54 – -0.07)      | 0.01*       |                                                           |                               |             |
| Comfortable walking speed in m/s                       | 166                 | -0.12   | -3.01<br>(-6.81 – 0.80)       | 0.12        |                                                           |                               |             |                                                           |                               |             |                                                           |                               |             |
| Maximum walking speed in m/s                           | 166                 | -0.18   | -2.39<br>(-4.48 – -0.30)      | 0.03*       |                                                           |                               |             |                                                           |                               |             | -0.18                                                     | -2.38<br>(-4.56 – -0.20)      | 0.03*       |
| Barthel ADL Index in Points                            | 162                 | -0.13   | -0.16<br>(-0.36 – 0.04)       | 0.12        |                                                           |                               |             |                                                           |                               |             |                                                           |                               |             |

Explanation of table: Model 1 is not including CST and maximum walking speed because of their high correlation with BBS (r=0.7). Model 2 is not including BBS and maximum walking speed because of their high correlation with CST (r=0.7). Model 3 is not including BBS and CST because of their high correlation with maximum walking speed (r=0.7), *n* = number of registered, *R*<sup>2</sup> = adjusted coefficient of determination, *B* = Unstandardised beta, *CI* = 95% confidence interval,  $\beta$  = standardised beta, *Sig.* = levels of significance (p-value), \* = *p* < 0.05, MMSE: range 0-30; low score indicates poor cognitive function, BBS range 0-56; high score indicates good balance, 30 seconds CST: number of rises from chair within 30 sec., comfortable and maximum walking speed in m/s; high score on the physical tests are positive (better physical function), Barthel ADL Index: range 0-20; high score indicates dependency, Cornell Scale for Depression in Dementia: range 0-38; high score indicates more depressive symptoms

*Associations between physical function and being depressed or not being depressed:*

The unadjusted and adjusted logistic regression analyses revealed significant differences between the group classified as depressed (Cornell  $\geq 8$ ) and the group classified as not depressed in terms of the variables measuring balance (BBS) and muscle strength (CST). The group classified as not depressed revealed higher scores on The Berg Balance Test and 30 Seconds Chair Stand Test compared to the group classified as depressed (Table 4).

Table 4: Logistic unadjusted and adjusted regression analyses of the strength of associations between the groups with depression (Cornell  $\geq 8$ ) and without depression (Cornell  $< 8$ ) and variables measuring demographic factors, cognitive and physical performance

| Independent variables                                  | Unadjusted analysis |                      |       | Adjusted analysis Model 1 |                     |       | Adjusted analysis Model 2 |                     |       |
|--------------------------------------------------------|---------------------|----------------------|-------|---------------------------|---------------------|-------|---------------------------|---------------------|-------|
|                                                        | B                   | OR (95% CI)          | Sig.  | B                         | OR (95% CI)         | Sig.  | B                         | OR (95% CI)         | Sig.  |
| Age in years                                           | -0.20               | 0.822 (0.35 – 1.91)  | 0.65  | -0.02                     | 0.983 (0.93 – 1.04) | 0.51  | -0.01                     | 0.988 (0.94 – 1.04) | 0.65  |
| Gender (1=women and 2=men)                             | -0.01               | 0.995 (0.95 – 1.05)  | 0.85  | -0.27                     | 0.765 (0.31 – 1.92) | 0.57  | -0.10                     | 0.907 (0.37 – 2.25) | 0.83  |
| Duration of stay in nursing home (months)              | 0.01                | 1.006 (0.99 – 1.02)  | 0.43  |                           |                     |       |                           |                     |       |
| Number of diagnoses                                    | 0.17                | 1.183 (0.97 – 1.44)  | 0.09  |                           |                     |       |                           |                     |       |
| Number of drugs                                        | 0.10                | 1.104 (0.98 – 1.24)  | 0.09  |                           |                     |       |                           |                     |       |
| Use of walking aid (0=no and 1=yes)                    | 0.47                | 1.592 (0.69 – 3.67)  | 0.28  |                           |                     |       |                           |                     |       |
| Able to rise from chair independently (0=no and 1=yes) | 1.27                | 3.576 (0.98 – 13.10) | 0.054 |                           |                     |       |                           |                     |       |
| Mini-Mental State Examination in Points                | -0.01               | 0.993 (0.92 – 1.07)  | 0.86  |                           |                     |       |                           |                     |       |
| Bergs Balance Test in Points                           | -0.03               | 0.969 (0.95 – 0.99)  | 0.02* | -0.03                     | 0.968 (0.94 – 0.99) | 0.01* |                           |                     |       |
| 30 Seconds Chair Stand Test in number                  | -0.16               | 0.853 (0.75 – 0.97)  | 0.02* |                           |                     |       | -0.16                     | 0.848 (0.74 – 0.97) | 0.02* |
| Comfortable walking speed in m/s                       | -1.08               | 0.340 (0.04 – 2.77)  | 0.31  |                           |                     |       |                           |                     |       |
| Maximum walking speed in m/s                           | -1.07               | 0.342 (0.10 – 1.14)  | 0.08  |                           |                     |       |                           |                     |       |
| Barthel Index in Points                                | -0.08               | 0.924 (0.83 – 1.03)  | 0.14  |                           |                     |       |                           |                     |       |

Explanation of table: Model 1 is not including CST because of high correlation with BBS ( $r=0.7$ ). Model 2 is not including BBS because of high correlation with CST ( $r=0.7$ ), *B* = Unstandardised beta, *OR* = Odd ratio, *CI* = 95% confidence interval, *Sig.* = levels of significance (p-value), \* =  $p < 0.05$ , MMSE: range 0-30; low score indicates poor cognitive function, BBS range 0-56; high score indicates good balance, 30 seconds CST: number of rises from chair within 30 sec., comfortable and maximum walking speed in m/s; high score on the physical tests are positive (better physical function), Barthel ADL Index: range 0-20; high score indicates dependency, CSDD: range 0-38; 0 = not depressed: Cornell score  $< 8$ , 1 = depressed: Cornell score  $\geq 8$

Furthermore the unadjusted logistic regression analysis provided a statistical trend,  $p < 0.10$ , were the group with depression have multiple diagnoses and use more medications ( $p = 0.09$ ), have a lower maximum walking speed ( $p = 0.08$ ) and are less able to rise from chair independently ( $p = 0.05$ ), compared to the group without depression.

## DISCUSSION

Nursing home residents with dementia are a heterogeneous group in terms of physical function and depression. By applying the recommended cutoff of  $\geq 8$  on CSDD, 23.5% of the participants were classified as being depressed. Large differences in physical and mental health among institutional residents have also been underlined by other authors,(19, 40, 60) as well as the prevalence of depression in nursing home residents with dementia.(6, 9, 19, 61) A Swedish study among persons aged 85 and over showed a 27% prevalence of depression in general but a 42% prevalence among those living in institutions.(7) Studies have shown that depression among those in residential care is associated with decreased cognitive status, functional capacity, clinician-rated health,(62) and increased mortality.(63) The common comorbidity of depression and dementia further increases risks of functional disability and nursing home admissions.(64)

Our results revealed significant associations between higher scores on the CSDD, indicating more symptoms of depression, and lower scores on BBS ( $p=0.006$ ), 30 seconds CST ( $p=0.001$ ) as well as maximum walking speed ( $p=0.003$ ), indicating lower level of physical function. This corresponds well with the notion that high level of physical activity is associated with preservation of physical function in daily life,(22, 27, 65-67) and a low prevalence of depressive symptoms.(16-17) Further, with the exception of walking speed, the differences in physical function remained significant between the groups classified as depressed ( $CSDD \geq 8$ ) and not depressed ( $CSDD < 8$ ) in the logistic regression analyses. The findings confirmed our assumption that depression and depressive symptoms among nursing home residents with dementia are significantly associated with functional performance.

Our findings regarding age, gender and duration of stay in nursing home corresponded well with results from similar studies and reports among nursing home residents.(40, 68-71) Depression is a complex phenomenon in terms of causes and symptoms.(72) The adjusted determination coefficient ( $R^2$ ) was low, and approximately the same, in all three models (Table 3) indicating that depression is a complex phenomenon. Overall our results underline the fact that depression has many explanatory mechanisms. Physical function alone cannot explain depression, although there are significant associations.(73)

We found no significant associations between ADL-function and depression, which is in line with the study of Barca and colleagues,(9) and in contrast to other studies.(8, 29) However,



1  
2  
3 the Barthel Index is a proxy-reported measurement, and may not be sensitive enough to  
4 identify the true abilities of an individual.(30) The readiness of the nursing home staff to  
5 assist as well as the institutionalization of the residents may influence the scores on Barthel  
6 Index. Our study showed no significant associations between depression and the degree of  
7 cognitive impairment. This is in line with another study that included participants with  
8 dementia,(74) but it is inconsistent with results from a study that included both cognitively  
9 intact and dementia sufferers.(9)  
10  
11  
12  
13

14  
15  
16 Several factors can influence physical function. Psychotropic medications, benzodiazapines or  
17 antipsychotic medications may affect balance and physical functioning. Inactivity, the  
18 precursor for reduced physical function, can be a direct result of depression as common  
19 symptoms are lack of interest in activities and loss of energy.(6,8,12) Unfortunately, there are  
20 no available data on the types of medications that the participating residents used. The  
21 category “chronic disorders” embraces musculoskeletal diagnoses, cardiovascular disorders,  
22 psychiatric diagnoses and co-morbid neurological conditions such as for example epilepsy,  
23 stroke, and Parkinson`s Disease. These are all disorders that can affect balance and physical  
24 function. However there were no significant differences between the group of depressed and  
25 not depressed regarding musculoskeletal, neurological or cardiovascular diagnoses. Depressed  
26 participants had significantly more psychiatric diagnoses than the not depressed ( $p = 0,02$ ),  
27 which were expected considering depression was included in this category.  
28  
29  
30  
31  
32  
33  
34  
35  
36  
37

38 When more than one statistical test is conducted in analysing data from clinical studies, some  
39 demand that a more stringent criterion should be used for statistical significance than the  
40 conventional  $p < 0,05$ . However according to Perneger and coworkers adjustments for  
41 multiple tests (Bonferroni adjustments) creates more problems than it solves. They state that  
42 simply describing what tests of significance that have been performed, and why, is generally  
43 the best way of dealing with multiple comparisons.(75) Although we have conducted several  
44 tests, we have therefore not performed adjustments for statistical significance (the Bonferroni  
45 method), but recommend reflective and cautious interpretation of the results. There are some  
46 variables missing from the dataset. Regarding the physical tests, the main reason for this is the  
47 fact that the residents were not available in the testing moment the specific day. Some  
48 residents were not capable of performing the MMSE test because of hearing and vision  
49 impairment. The MMSE measurement is sensitive to factors like education level, age, sensory  
50 impairment, literacy problems, lack of motivation, impaired vision and hearing and depressive  
51  
52  
53  
54  
55  
56  
57  
58  
59  
60

1  
2  
3 disorders.(56) These factors may also explain the lack of correlation with depression in this  
4 study.  
5  
6

### 7 8 **Strength and limitations of the study**

9  
10 The study included a well-defined population of older nursing homes residents with mild and  
11 moderate dementia defined by score of 1 or 2 on the Clinical Dementia Rating Scale.(35) The  
12 inclusion criteria made it possible to include participants with a broad range of mental and  
13 functional capacities. In addition, the study population seems to represent nursing home  
14 residents with respect to age and gender, which is a further strength.(40, 69) Measuring  
15 instruments employed in this study are standardized and commonly used in clinical practice  
16 among frail elderly in nursing homes.  
17  
18  
19  
20  
21

22  
23 The present study has several limitations. The participants were enrolled in a physical  
24 exercise intervention trail (EXDEM), so they were likely to be fitter and maybe more  
25 motivated than those who would not have agreed to be part of the intervention. In addition,  
26 due to safety and the importance of the participants receiving instruction during exercise, the  
27 residents with severe communication problems were excluded. Because of this, the  
28 associations revealed in this study may not be applicable to the overall population of nursing  
29 home residents with dementia. Many of the participants in our study did not have a prior  
30 dementia diagnosis. However, all the residents had been diagnosed using the CDR, a  
31 commonly used instrument in nursing homes. CDR score have been found to be in agreement  
32 with the golden standard of dementia diagnosis.(76) According to score on CDR all the  
33 residents were suffering from mild and moderate dementia. However, on MMSE 11% scored  
34 lower than 10 points, which may indicate severe dementia. This means that 16 participants  
35 may have been wrongly categorized as sufferers of mild/moderate dementia, which may have  
36 influenced the results. Drugs and diagnoses were to be reported in the case report.  
37  
38 Regretfully, some of the designated health care workers failed to complete the case report.  
39 This resulted in lacking information about drugs and diagnoses in some cases, which could be  
40 of importance regarding the interpretation of the results. Because of the cross-sectional design  
41 of the study we cannot draw conclusions about causality.  
42  
43  
44  
45  
46  
47  
48  
49  
50  
51  
52

53  
54 Despite the limitations, the study represent important information about associations between  
55 depression and physical function in a population of elderly nursing home residents with mild  
56 to moderate dementia.  
57  
58  
59  
60

## CONCLUSION

Our study has shown that nursing homes residents with good physical function (balance, muscle strength and walking speed) experienced less depressive symptoms. These results suggest that interventions aiming to increase physical performance may influence symptoms of depression in older people who live in nursing homes and that preventative strategies at latest should be implemented when nursing home residents shows decline in balance and muscle strength. Further studies should investigate possible methods how to motivate nursing home residents to participate in physical activity and how health workers in nursing home might contribute to improve physical functioning and thus to decrease depressive symptoms in nursing home residents. The potential interaction of dementia with poor physical function and depression indicates an area to explore in future epidemiological studies with a prospective design.

### Author Affiliations

- 1 Faculty of Health Sciences, Department of Physiotherapy, Oslo and Akershus University College of Applied Sciences, Oslo, Norway
- 2 Ryen Helsehus / Short-term rehabilitation, Nursing Home Agency, Oslo, Norway
- 3 Norwegian National Advisory Unit on Ageing and Health, Vestfold Hospital Trust

**Contributors:** LAHK, AB and EWT participated in contribution to the design of the study, accountability for all aspects of the work and approval of the published version. LAHK was involved in drafting of the work. AB and EWT were responsible for revising the work.

**Funding:** This work was funded by The Norwegian Fund for Post-Graduate Training in Physiotherapy, and the support of this organization is gratefully acknowledged. The original project has been made possible by the Norwegian Extra Foundation for Health and Rehabilitation.

**Competing interests:** The authors declare no conflicts of interest.

**Patient consent:** Obtained.

**Ethics approval:** The study was approved by the Regional Committee for Medical Ethics in Norway, reference number: 2012/1150.

**Data sharing statement:** No additional data are available.

**Twitter:** Follow Linda Kvæl at @lindakvael

## REFERENCES

1. Prince, M, Bryce, R, Albanese, E, et al. The Global Prevalence of Dementia: A systematic Review and Metaanalysis. *Alzheimers Dement*. 2013;9(1):63-75.
2. Seitz, D, Purandare, N and Conn, D. Prevalence of psychiatric disorders among older adults in long-term care homes: a systematic review. *Int Psychogeriatr*. 2010;22(7):1025-39.
3. Lithgow, S, Jackson, G.A and Browne, D. Estimating the prevalence of dementia: cognitive screening in Glasgow nursing homes. *Int J Geriatr Psychiatry*. 2012;27(8):785-91.
4. Cheng, S-T, Lam, L.C and Chow, P.K. Under-recognition of dementia in long-term care homes in Hong Kong. *Aging Ment Health*. 2012;16(4):516-20.
5. Cherubini, A, Ruggiero, C, Dell'Aquila, G, et al. Underrecognition and Undertreatment of Dementia in Italian Nursing Homes. *J Am Med Dir Assoc*. 2012;13(8):113-19.
6. Selbæk, G, Kirkevold, Ø and Engedal, K. The prevalence of psychiatric symptoms and behavioural disturbances and the use of psychotropic drugs in Norwegian Nursing homes. *Int J Geriatr Psychiatry*. 2007;22(9):843-49.
7. Bergdahl, E, Allard, P and Gustafson, Y. Depression among very old with dementia. *Int Psychogeriatr*. 2011;23(5):756-63.
8. Mjørud, M, Engedal, K, Barca, M.L, et al. Livskvalitet, depressive symptomer og funksjonssvikt hos personer med demens. *Sykepleien Forskning*. 2011;6(2):178-86.
9. Barca, M.L, Selbæk, G, Laks, J, et al. Factors associated with depression in Norwegian nursing homes. *Int J Geriatr Psychiatry*. 2009;24(4):417-25.
10. World Health Organization. [Online] Health Topics, Depression [Cited: Mars 25., 2016.] [www.who.int/topics/depression/en/](http://www.who.int/topics/depression/en/)
11. Djernes, J.K. Prevalence and predictors of depression in populations of elderly: a review. *Acta Psychiatr Scand*. 2006;113(5):372-87.
12. Jongenelis, K, Pot, A.M, Eisses, A.M, et al. Prevalence and risk indicators of depression in elderly nursing home patients: the AGED study. *J Affect Disord*. 2004;83(2-3):135-42.
13. Djernes, J.K, Gulmann, N.C, Foldgaer, L, et al. 13 year follow up of morbidity, mortality and use of health services among elderly depressed patients and general elderly populations. *Aust N Z J Psychiatry*. 2011;45(8):654-62.
14. Kitwood, T. Understanding senile dementia: a psychobiographical approach. *Free Associations*. 1990;19:60-75.
15. World Health Organization. [Online] Media Centre, Depression, fact sheets. [Cited: Mars 25., 2016.] <http://www.who.int/mediacentre/factsheets/fs369/en/>
16. Fukukawa, Y, Nakashima, C, Tsuboi, S, et al. Age differences in the effect of physical activity on depressive symptoms. *Psychol Aging*. Jnu 2004;19(2):346-51.
17. Barbour, K.A, Edenfield, T.M and Blumenthal, J.A. Exercise as a treatment for depression and other psychiatric disorders: a review. *J Cardiopulm Rehabil Prev*. 2007;27(6):359-67.
18. Windle, G, et al. Is exercise effective in promoting mental well-being in older age? A systematic review. *Aging Ment Health*. 2010;14(6):652-69.
19. Telenius, E.W, Engedal, K and Bergland, A. Physical Performance and Quality of Life of Nursing-Home Residents with Mild and Moderate Dementia. *Int J Environ Res Public Health*. 2013;10(12):6672-86.
20. Kolanowski, A, Buettner, L, Litaker, M, et al. Factors that relate to activity engagement in nursing home residents. *Am J Alzheimers Dis Other Dement*. 2006;21(1):15-22.
21. Forbes, D, Forbes, S.C, Blake C.M, et al. [Online] Exercise programs for people with dementia (Review). *Cochrane Library*. 2015. <http://onlinelibrary.wiley.com/doi/10.1002/14651858.CD006489.pub4/epdf>
22. Singh, M.A. Exercise comes of age. Rationale and recommendations for a geriatric exercise prescription. *J Gerontol A Biol Sci Med Sci*. 2002;57(5):262-82.

- 1  
2  
3  
4  
5  
6  
7  
8  
9  
10  
11  
12  
13  
14  
15  
16  
17  
18  
19  
20  
21  
22  
23  
24  
25  
26  
27  
28  
29  
30  
31  
32  
33  
34  
35  
36  
37  
38  
39  
40  
41  
42  
43  
44  
45  
46  
47  
48  
49  
50  
51  
52  
53  
54  
55  
56  
57  
58  
59  
60
23. **Helbostad, J.L.** Physical training for nursing home residents - has it any effect? *Tidsskr Nor Laegeforen.* 2005;125(9):1195-97.
24. **Nelson, M.E, Rejeski, W.J, Blair, S.N, et al.** Physical activity and public health in older adults: recommendations from the American College of Sports Medicine and the American Heart Association. *Med Sci Sports Exerc* 2007;39(8):1435-45.
25. **Rolland, Y, Pillard, F, Klapouszczak, A, et al.** Exercise Program for Nursing Home Residents with Alzheimer's Disease: A 1-Year Randomized Controlled Trial. *J Am Geriatr Soc.* 2007;55(2):158-65.
26. **American College of Sports Medicine, Chodzko-Zajko, W.J, Proctor, D.N, et al.** American College of Sports Medicine Position stand. Exercise and physical activity for older adults. *Med Sci Sports Exerc.* 2009; 41(7):1510-30.
27. **Weening-Dijksterhuis, E, de Greef, M.H, Scherder, E.J, et al.** Frail institutionalized older persons: A comprehensive review on physical exercise, physical fitness, activities of daily living, and quality-of-life. *Am J Phys Med Rehabil.* 2011;90(2):156-68.
28. **Grønstedt, H.** Individually tailored physical and daily activities for residents in nursing home settings - A Scandinavian multi-centre study (Phd-thesis) Stockholm: Karolinska institutet, 2013.
29. **Kaup, B.A, Loreck, D, Gruber-Baldini, A.L, et al.** Depression and Its Relationship to Function and medical Status, By Dementia Status, in Nursing Home Admissions. *Am J Geriatr Psychiatry.* 2007;15(5)438-42.
30. **Brach, J.S, VanSwearingen, J.M, Newman, A.B, et al.** Identifying early decline of physical function in community-dwelling older women: Performance-based and self-report measures. *Phys Ther* 2002;82(4):320-28.
31. **Borza, T, Engedal, K, Bergh, S, et al.** The course of depressive symptoms as measured by the Cornell Scale for Depression in Dementia over 74 months in 1158 nursing home residents. *J Affect Disord.* 2015; 175:209-16.
32. **Lolk, A and Andersen, K.** Prevalence of depression and dementia among nursing home residents. *Ugeskr Laeger.* 2015;177(12) V:11140591.
33. **Løvheim, H, Sandman, P.O, Kallin, K, et al.** Relationship between antipsychotic drug use and behavioral and psychological symptoms of dementia in old people with cognitive impairment living in geriatric care. *Int Psychogeriatr.* 2006;18(4):713-26.
34. **Olsen, C, Pedersen, I, Bergland, A, et al.** Effect of animal-assisted interventions on depression, agitation and quality of life in nursing home residents suffering from cognitive impairment or dementia: a cluster randomized controlled trial. *Int J Geriatr Psychiatry.* 2016;31(12):1312-21.
35. **Hughes, C.P, Berg, L, Danziger, W.L, et al.** A new clinical scale for the staging of dementia. *Br J Psychiatry.* 1982;140:566-72.
36. **Alexopoulos, G.S, Abrams, R.C, Young, R.C, et al.** Cornell Scale for Depression in Dementia. *Biol Psychiatry.* 1988;23(3):271-84.
37. **Barka, M.L, Selbaek, G, Laks, J, et al.** The pattern of depressive symptoms and factor analysis of the Cornell Scale among patients in Norwegian Nursing homes. *Int J Geriatr Psychiatry.* 2008;23(10):1058-65.
38. **Barca, M.L, Engedal, K and Selbaek, G.** A reliability and validity study of the Cornell Scale among elderly inpatients, using various clinical criteria. *Dement Geriatr Cogn Disord.* 2010;29(5):438-47.
39. **Berg, K, Wood-Dauphine, S, Willims, J.I, et al.** Measuring balance in the elderly: Preliminary development of an instrument. *Physiotherapy Canada.* 1989;41(6):304-11.
40. **Bergland, A, Narum, I, Grønstedt, H, et al.** Evaluating the feasibility and the intercorrelation of measurements on the functioning of residents living in Scandinavian nursing homes. *Physical & Occupational Therapy in Geriatrics.* 2010;28(2):154-69.
41. **Bogle Thorbahn, L.D and Newton, R.A.** Use of the Berg Balance test to predict falls in elderly persons. *Phys Ther.* 1996;76(6):576-83.
42. **Halsaa, K.E, Brovold, T, Graver, V, et al.** Assessments of interrater reliability and internal consistency of the Norwegian version of the Berg Balance Scale. *Arch Phys Med Rehabil.* 2007;88(1):94-98.
43. **Telenius, E.W, Engedal, K and Bergland, A.** [Online] Inter-rater reliability of the Bergs Balance Scale, 30s chair stands test and 6 m walking test, and construct validity of the Bergs Balance Scale in nursing home residents with mild-to-moderate dementia. *BMJ Open Rehabilitation Medicine.* 2015;5(9) <http://dx.doi.org/10.1136/bmjopen-2015-008321>
44. **Conradsson, M, Lundin-Olsson, L, Lindeløf, N, et al.** Berg balance scale: intrarater test-retest reliability among older people dependent in activities of daily living and living in residential care facilities. *Phys Ther.* 2007;87(9):1155-63.
45. **Rikli, R and Jones, C.J.** *Senior Fitness Test Manual Second edition.* Copenhagen: FADL's forlag, 2013.
46. **Telenius, E.W, Engedal, K and Bergland, A.** Effect of a high-intensity exercise program on physical function and mental health in nursing home residents with dementia: an assessor blind randomized controlled trial. *PLoS One.* 2015;10(5):e0126102.

- 1  
2  
3 47. **Csuka, M and McCarty, D.J.** Simple method for measurement of lower extremity muscles strength. *Am J Med.* 1985;78(1):77-81.
- 4  
5 48. **Goldberg, A, Chavis, M, Watkins, J, et al.** The five-times-sit-to-stand test: validity, reliability and detectable change in  
6 older females. *Aging Clin Exp Res.* 2012;24(4):339-44.
- 7 49. **Studenski, S, Perera, S, Wallace, D, et al.** Physical performance measures in the clinical setting. *J Am Geriatr Soc.*  
8 2003;51(3):314-22.
- 9 50. **Peel, N.M, Kuys, S.S and Klein, K.** Gait speed as a Measure in Geriatric Assessment in Clinical Settings: A systematic  
10 Review. *J Gerontol A Biol Sci Med Sci.* 2013;68(1):39-46.
- 11 51. **Mahoney, F.I and Barthel, D.W.** Functional evaluation. The Barthel Index. *Md State Med J.* 1965;14:61-65.
- 12 52. **Collin, C, Wade, D.T, Davies, S, et al.** The Barthel ADL Index: a reliability study. *Int Disabil Stud.* 1988;10(2):61-63.
- 13 53. **Engedal, K and Haugen, P:K.** The prevalence of dementia in a sample of elderly Norwegian. *Int J Geriatr Psychiatry.*  
14 1993;8(7):565-70.
- 15 54. **Nygaard, H.A and Ruths, S.** Missing the diagnosis: Senile dementia in patients admitted to nursing homes. *Scand J*  
16 *Prim Helath Care.* 2003;21(3):148-52.
- 17 55. **Folstein, M.F, Folstein, S.E and McHugh, P.R.** "Mini-Mental State". A practical method for grading the cognitive state  
18 of patients for the clinician. *J Psychiatr Res.* 1975;12(3):189-98.
- 19 56. **Strobel, C and Engedal, K.** *MMSE-NR. Norsk Revidert Mini Mental Status Evaluering. Revidert og utvidet manual.*  
20 Oslo: Nasjonalt Kompetansesenter for Aldring og Helse, 2008.
- 21 57. **Pallant, J.** *SPSS Survival manual. A step by step guide to data analysis using SPSS. 4 th edition:* Allen & Unwin Book  
22 Publisher, 2010.
- 23 58. **Hogalin, D.C, Iglewicz, B and Tukey, J.W.** Performance of some resistant rules for outlier labeling. *Journal of*  
24 *American Statistical Association.* 1986;81(396):991-99.
- 25 59. **Kukull, W.A, Larson, E.B, Teri, L, et al.** The mini-mental state examination score and the clinical diagnosis of  
26 dementia. *J Clin Epidemiol.* 1994;47(9):1061-67.
- 27 60. **Frandin, K, Borell, L, Grønstedt, H, et al.** A nordic multi-center study on physical and daily activities for residents in  
28 nursing home setting: design of a randomized, controlled trial. *Aging Clin Exp Res.* Aug 2009;21(4-5):314-22.
- 29 61. **Rosenvinge, B.H and Rosenvinge, J.H.** Occurrence of depression in the elderly - a systematic review of 55 prevalence  
30 studies from 1990-2001. *Tidsskr Nor Laegeforen.* 2003;123(7):928-29.
- 31 62. **Katz, I.R, Simpson, G.M, Curlik, S.M, et al.** Pharamological treatment of major depression for elderly patients in  
32 residential care settings. *J Clin Psychiatry.* 1990;51:41-48.
- 33 63. **Rovner, B.W, German, P.S, Brant, L.J, et al.** Depression and mortality in nursing homes. *JAMA.* 1991;265(8):993-96.
- 34 64. **Kales, H.C, Chen, P, Blow, F.C, et al.** Rates of clinical depression diagnosis, functional impairment, and nursing home  
35 placement in coexisting dementia and depression. *Am J Geriatr Psychiatry.* 2005;13(6):441-49.
- 36 65. **Heyn, P, Abreu, B.C and Ottenbacher, K.J.** The effects of exercise training on elderly persons with cognitive  
37 impairment and dementia: a meta-analysis. *Arch Phys Med Rehabil.* 2004;85(10):1694-1704.
- 38 66. **Chin, A, Paw, M.J, van Uffelen, J.G, et al.** The functional effects of physical exercise training in frail older people: a  
39 systematic review. *Sports Med.* 2008;38(9):781-93.
- 40 67. **Forster, A, Lambley, R, Hardy, J, et al.** [Online] Rehabilitation for older people in long-term care (Review). *Cochrane*  
41 *Database Syst Rev.* 2009;21(1) <http://onlinelibrary.wiley.com/doi/10.1002/14651858.CD004294.pub2/epdf>
- 42 68. **Wolter, L.L and Studenski, S.A.** A clinical synthesis of falls intervention trials. *Top Geriatr Rehabil.* 1996;11(3):9-19.
- 43 69. **Barca, M.L, Engedal, K, Laks, J, et al.** Quality of life among elderly patients with dementia in institutions. *Dement*  
44 *Geriatr Cogn Disord.* 2011;31(6):435-42.
- 45 70. **Grønstedt, H, Hellstrøm, K, Bergland, A, et al.** Functional level, physical activity and wellbeing in nursing home  
46 residents in three Nordic countries. *Ageing Clinical and Experimental Research.* 2011;23(5):413-20.
- 47 71. **Statistisk Sentralbyrå.** *Eldres bruk av helse- og omsorgstjenester.* Ramm, J (red). Oslo: 2013.
- 48 72. **Iden, K.R.** *Depresjon i sykehjem - underdiagnostikk og overbehandling.* Avhandling for graden philosophiae doctor  
49 (PhD): Universitetet i Bergen, 2015.
- 50 73. **Bjørndal, A and Hofoss, D.** *Statistikk for helse- og sosialfagene.* Oslo: Gyldendal Akademisk, 2010.
- 51 74. **Verkaik, R, Nuyen, J, Schellevis, J, et al.** The relationship between severity of Alzheimer's disease and prevalence of  
52 comorbid depressive symptoms and depression: a systematic review. *Int J Geriatr Psychiatry.* 2007;22(11):534-42.
- 53  
54  
55  
56  
57  
58  
59  
60

1  
2  
3 75. **Perneger, Y.V.** What's wrong with Bonferroni adjustments. *BMJ*. 1998;316(7139):1236-38.

4 76. **Chaves, M.L, Camozzato, A.L, Godinho, C, et al.** Validity of the clinical dementia rating scale for the detection and  
5 staging of dementia in Brazilian patients. *Alzheimers Dis Assoc Disord*. 2007;21(3):210-17.  
6  
7  
8  
9  
10  
11  
12  
13  
14  
15  
16  
17  
18  
19  
20  
21  
22  
23  
24  
25  
26  
27  
28  
29  
30  
31  
32  
33  
34  
35  
36  
37  
38  
39  
40  
41  
42  
43  
44  
45  
46  
47  
48  
49  
50  
51  
52  
53  
54  
55  
56  
57  
58  
59  
60

For peer review only

STROBE 2007 (v4) Statement—Checklist of items that should be included in reports of *cross-sectional studies*

| Section/Topic             | Item # | Recommendation                                                                                                                                                                       | Reported on page # |
|---------------------------|--------|--------------------------------------------------------------------------------------------------------------------------------------------------------------------------------------|--------------------|
| Title and abstract        | 1      | (a) Indicate the study’s design with a commonly used term in the title or the abstract                                                                                               | Page 1             |
|                           |        | (b) Provide in the abstract an informative and balanced summary of what was done and what was found                                                                                  | Page 2             |
| <b>Introduction</b>       |        |                                                                                                                                                                                      | Page 4-5           |
| Background/rationale      | 2      | Explain the scientific background and rationale for the investigation being reported                                                                                                 | Page 4-5           |
| Objectives                | 3      | State specific objectives, including any prespecified hypotheses                                                                                                                     | Page 5             |
| <b>Methods</b>            |        |                                                                                                                                                                                      | Page 5-9           |
| Study design              | 4      | Present key elements of study design early in the paper                                                                                                                              | Page 5             |
| Setting                   | 5      | Describe the setting, locations, and relevant dates, including periods of recruitment, exposure, follow-up, and data collection                                                      | Page 5-6           |
| Participants              | 6      | (a) Give the eligibility criteria, and the sources and methods of selection of participants                                                                                          | Page 5-6           |
| Variables                 | 7      | Clearly define all outcomes, exposures, predictors, potential confounders, and effect modifiers. Give diagnostic criteria, if applicable                                             | Page 6-8           |
| Data sources/ measurement | 8*     | For each variable of interest, give sources of data and details of methods of assessment (measurement). Describe comparability of assessment methods if there is more than one group | Page 6-8           |
| Bias                      | 9      | Describe any efforts to address potential sources of bias                                                                                                                            | Page 8 and 16-17   |
| Study size                | 10     | Explain how the study size was arrived at                                                                                                                                            | Page 5-6           |
| Quantitative variables    | 11     | Explain how quantitative variables were handled in the analyses. If applicable, describe which groupings were chosen and why                                                         | Page 8-9 and 16    |
| Statistical methods       | 12     | (a) Describe all statistical methods, including those used to control for confounding                                                                                                | Page 8-9           |
|                           |        | (b) Describe any methods used to examine subgroups and interactions                                                                                                                  | Page 8-9           |
|                           |        | (c) Explain how missing data were addressed                                                                                                                                          | Page 16-17         |
|                           |        | (d) If applicable, describe analytical methods taking account of sampling strategy                                                                                                   | Page 8-9           |
|                           |        | (e) Describe any sensitivity analyses                                                                                                                                                | Page 8-9           |
| <b>Results</b>            |        |                                                                                                                                                                                      | Page 9-14          |

1  
2  
3  
4  
5  
6  
7  
8  
9  
10  
11  
12  
13  
14  
15  
16  
17  
18  
19  
20  
21  
22  
23  
24  
25  
26  
27  
28  
29  
30  
31  
32  
33  
34  
35  
36  
37  
38  
39  
40  
41  
42  
43  
44  
45  
46  
47  
48  
49



|                          |     |                                                                                                                                                                                                                                                                                                                                                                                                               |                       |
|--------------------------|-----|---------------------------------------------------------------------------------------------------------------------------------------------------------------------------------------------------------------------------------------------------------------------------------------------------------------------------------------------------------------------------------------------------------------|-----------------------|
| Participants             | 13* | (a) Report numbers of individuals at each stage of study—eg numbers potentially eligible, examined for eligibility, confirmed eligible, included in the study, completing follow-up, and analysed<br>(b) Give reasons for non-participation at each stage<br>(c) Consider use of a flow diagram                                                                                                               | Page 5-6              |
| Descriptive data         | 14* | (a) Give characteristics of study participants (eg demographic, clinical, social) and information on exposures and potential confounders<br>(b) Indicate number of participants with missing data for each variable of interest                                                                                                                                                                               | Page 9-10<br>Page 10  |
| Outcome data             | 15* | Report numbers of outcome events or summary measures                                                                                                                                                                                                                                                                                                                                                          | Page 11               |
| Main results             | 16  | (a) Give unadjusted estimates and, if applicable, confounder-adjusted estimates and their precision (eg, 95% confidence interval). Make clear which confounders were adjusted for and why they were included<br>(b) Report category boundaries when continuous variables were categorized<br>(c) If relevant, consider translating estimates of relative risk into absolute risk for a meaningful time period | Page 12-13<br>Page 14 |
| Other analyses           | 17  | Report other analyses done—eg analyses of subgroups and interactions, and sensitivity analyses                                                                                                                                                                                                                                                                                                                | Page 12               |
| <b>Discussion</b>        |     |                                                                                                                                                                                                                                                                                                                                                                                                               | Page 15-17            |
| Key results              | 18  | Summarise key results with reference to study objectives                                                                                                                                                                                                                                                                                                                                                      | Page 15               |
| Limitations              | 19  | Discuss limitations of the study, taking into account sources of potential bias or imprecision. Discuss both direction and magnitude of any potential bias                                                                                                                                                                                                                                                    | Page 16-17            |
| Interpretation           | 20  | Give a cautious overall interpretation of results considering objectives, limitations, multiplicity of analyses, results from similar studies, and other relevant evidence                                                                                                                                                                                                                                    | Page 15-16            |
| Generalisability         | 21  | Discuss the generalisability (external validity) of the study results                                                                                                                                                                                                                                                                                                                                         | Page 17               |
| <b>Other information</b> |     |                                                                                                                                                                                                                                                                                                                                                                                                               | Page 18               |
| Funding                  | 22  | Give the source of funding and the role of the funders for the present study and, if applicable, for the original study on which the present article is based                                                                                                                                                                                                                                                 | Page 18               |

\*Give information separately for cases and controls in case-control studies and, if applicable, for exposed and unexposed groups in cohort and cross-sectional studies.

**Note:** An Explanation and Elaboration article discusses each checklist item and gives methodological background and published examples of transparent reporting. The STROBE checklist is best used in conjunction with this article (freely available on the Web sites of PLoS Medicine at <http://www.plosmedicine.org/>, Annals of Internal Medicine at <http://www.annals.org/>, and Epidemiology at <http://www.epidem.com/>). Information on the STROBE Initiative is available at [www.strobe-statement.org](http://www.strobe-statement.org).

# BMJ Open

## Associations Between Physical Function and Depression in Nursing Home Residents with Mild and Moderate Dementia: A cross-sectional study

|                                 |                                                                                                                                                                                                                                                                                                                                                                                                                                                                                                                                           |
|---------------------------------|-------------------------------------------------------------------------------------------------------------------------------------------------------------------------------------------------------------------------------------------------------------------------------------------------------------------------------------------------------------------------------------------------------------------------------------------------------------------------------------------------------------------------------------------|
| Journal:                        | <i>BMJ Open</i>                                                                                                                                                                                                                                                                                                                                                                                                                                                                                                                           |
| Manuscript ID                   | bmjopen-2017-016875.R1                                                                                                                                                                                                                                                                                                                                                                                                                                                                                                                    |
| Article Type:                   | Research                                                                                                                                                                                                                                                                                                                                                                                                                                                                                                                                  |
| Date Submitted by the Author:   | 19-May-2017                                                                                                                                                                                                                                                                                                                                                                                                                                                                                                                               |
| Complete List of Authors:       | Kvæ, Linda; Oslo and Akershus University College of Applied Sciences, Faculty of Health Sciences, Department of Physiotherapy; Ryen Helsehus / Short-term geriatric rehabilitation, Nursing Home Agency Bergland, Astrid; Oslo and Akershus University College of Applied Sciences, Faculty of Health Sciences, Department of Physiotherapy Telenius, Elisabeth; Oslo and Akershus University College of Applied Sciences, Faculty of Health Sciences, Department of Physiotherapy; Norwegian National Advisory Unit on Ageing and Health |
| <b>Primary Subject Heading</b>: | Geriatric medicine                                                                                                                                                                                                                                                                                                                                                                                                                                                                                                                        |
| Secondary Subject Heading:      | Mental health, Patient-centred medicine, Rehabilitation medicine, Health services research                                                                                                                                                                                                                                                                                                                                                                                                                                                |
| Keywords:                       | Nursing Home, Dementia < NEUROLOGY, Depression, Physical Function, GERIATRIC MEDICINE, Geriatric Rehabilitation                                                                                                                                                                                                                                                                                                                                                                                                                           |
|                                 |                                                                                                                                                                                                                                                                                                                                                                                                                                                                                                                                           |

SCHOLARONE™  
Manuscripts

only

1  
2  
3  
4  
5  
6  
7  
8  
9  
10  
11  
12  
13  
14  
15  
16  
17  
18  
19  
20  
21  
22  
23  
24  
25  
26  
27  
28  
29  
30  
31  
32  
33  
34  
35  
36  
37  
38  
39  
40  
41  
42  
43  
44  
45  
46  
47  
48  
49  
50  
51  
52  
53  
54  
55  
56  
57  
58  
59  
60

# Associations Between Physical Function and Depression in Nursing Home Residents with Mild and Moderate Dementia: A cross-sectional study

**Linda Aimée Hartford Kvæl<sup>1,2</sup>, Astrid Bergland<sup>1</sup>, Elisabeth Wiken Telenius<sup>1,3</sup>**

- 1 Faculty of Health Sciences, Department of Physiotherapy, Oslo and Akershus  
University College of Applied Sciences, Oslo, Norway
- 2 Ryen Helsehus / Short-term rehabilitation, Nursing Home Agency, Oslo, Norway
- 3 Norwegian National Advisory Unit on Ageing and Health, Vestfold Hospital Trust

## **Corresponding author**

Linda Aimée Hartford Kvæl

Skogvegen 19

2005 Rælingen, Norway

[lindaeriksen@hotmail.com](mailto:lindaeriksen@hotmail.com)

+4740474325

**Word count excluding title page, abstract, references and tables: 4283**

## ABSTRACT

**Objectives:** The primary aim of this study is to describe depression and physical function in nursing home residents with dementia, as well as to examine the associations between depression and balance function, lower limb muscle strength, mobility and activities of daily living. The secondary aim is to examine differences in physical function between the groups classified as depressed and not depressed.

**Design:** The study has a cross-sectional design.

**Setting:** A convenience sample of eighteen nursing homes in, and around, Oslo, Norway participated.

**Participants:** We included 170 nursing home residents aged 60-100 years suffering from mild or moderate degree of dementia defined by score of 1 or 2 on the Clinical Dementia Rating Scale (CDR).

**Outcome Measures:** Assessments used were Cornell Scale for Depression in Dementia (CSDD), Bergs Balance Scale (BBS), "the 6-meter walking test" (walking speed), 30 seconds Chair Stand Test (CST) and the Barthel Index.

**Results:** Nursing home residents with dementia are a heterogeneous group in terms of physical function and depression. By applying the recommended cutoff of  $\geq 8$  on CSDD, 23.5% of the participants were classified as being depressed. The results revealed significant associations between higher scores on the CSDD (indicating more symptoms of depression) and lower scores on BBS (95% CI: -0.12 to -0.02,  $p=0.006$ ), 30 seconds CST (95% CI: -0.54 to -0.07,  $p=0.001$ ) as well as maximum walking speed (95% CI: -4.56 to -0.20,  $p=0.003$ ) (indicating lower level of physical function).

**Conclusion:** Better muscle strength, balance and higher walking speed were significantly associated with less depressive symptoms. The potential interaction of dementia with poor physical function and depression indicates an area to explore in future epidemiological studies with a prospective design.

**Keywords:** Nursing home, dementia, depression, physical function, balance, muscle strength, mobility, walking-speed, activities of daily living.

**Strengths and limitations of this study**

- This study reports important information about the associations between physical function, assessed by performance-based tests, and depression in nursing home residents with dementia.
- The study included a well-defined population of older nursing homes residents with mild and moderate dementia defined by score of 1 or 2 on the Clinical Dementia Rating Scale.
- Measuring instruments employed in this study are standardized and commonly used in clinical practice among frail elderly in nursing homes.
- The participants were enrolled in a physical exercise intervention trial (EXDEM), so they were likely to be fitter than the average nursing home population.
- Because of the cross-sectional design of the study we cannot draw conclusions about causality.

## INTRODUCTION

Dementia impact has received increasing attention of governments and politicians across the world in recent years. Societies globally face an increasing proportion of older people who, by reason of age alone, are at increasing risk of dementia.(1) On an international level the prevalence of dementia among older adults in long-term care homes has a median of 58%,(2) but the underdiagnosis of dementia in nursing homes is commonly reported in literature worldwide.(3-5) Approximately 80% of people living in nursing homes in Norway suffer from dementia.(6) The prevalence of depressive disorders among nursing home residents is 10% while the prevalence of depressive symptoms is 29% on an international level.(2) Depression is frequently occurring in nursing home residents with dementia (43%),(7) and is associated with reduced quality of life,(8) poor medical health and more severe cognitive impairment.(9) The World Health Organization (WHO) defines depression as: "a mental disorder, characterized by sadness, loss of interest or pleasure, feelings of guilt or low self-worth, disturbed sleep or appetite, feelings of tiredness and poor concentration".(10) Reduced physical function and dependency in old age as well as somatic disorders are the main risk factors for developing depression.(9, 11) Loneliness and lack of social support are other risk factors.(12-13) Depression is a multifactorial concept and results from a complex interaction of social, psychological and biological factors.(14) According to WHO there are interrelationships between depression and physical health.(15)

Among elderly people in general, better physical function is associated with lower incidence of depressive symptoms.(16-17) It is also related to better mental health, quality of life and wellbeing.(18-19) Despite recommendations of regular physical activity, research shows that nursing home residents are spending most of their time seated or lying down, even when they are capable of independent or assisted activity.(20) It is alarming that residents who are capable of performing ADL activities independently or with assistance, often do not get the opportunity to participate actively, especially since physical function is a modifiable factor reliant on the continuous use of the musculoskeletal system.(21)

It is well known that physical function is modifiable through exercise. Even though the importance of physical activity for the preservation of function in elderly is well documented,(21-28) the relationship between physical function and depression in nursing home residents with dementia is unclear and results from studies are ambiguous. Some studies indicate that nursing home residents with good physical function are less depressed than those

1 with low level of physical function,(8, 29) while others do not find any significant  
2 associations between the two factors.(9)  
3  
4

5  
6 Studies that have investigated the relationship between physical function and depression in  
7 persons with dementia in nursing homes have largely employed proxy-reported measures of  
8 physical function, and not performance-based tests. Performance-based tests are more  
9 sensitive than self- or proxy-reported measures of physical function and may be better to  
10 identify the true abilities of an individual.(30) The relationship between physical function,  
11 tested with performance-based tests, and depression in nursing home residents with dementia  
12 seem to constitute a provisional "gap" in knowledge. The topic is important because  
13 depression in nursing home residents with dementia is common,(31-32) and good alternatives  
14 to psychotropic drugs are called for.(32-34)  
15  
16  
17  
18  
19  
20  
21

22  
23 It is important to identify modifiable factors underlying or associated with depression in the  
24 growing population of nursing home residents with dementia. Therefore, the primary aim of  
25 this study was to describe physical function and depression in this population, as well as to  
26 examine the associations between depression and levels of balance, muscle strength, mobility  
27 and daily life activity. The secondary aim was to examine differences in physical function  
28 between the group classified as depressed and not depressed. Although the authors have an  
29 assumption that there is a negative relationship between depression and physical function, the  
30 study is explorative and thus no hypotheses are tested.  
31  
32  
33  
34  
35  
36  
37  
38

## 39 **METHODS**

### 40 **Design**

41 The study has a cross-sectional design. The data were collected from baseline measurements  
42 of a randomized controlled trial (EXDEM) that was carried out in Norway in 2012 and 2013.  
43  
44  
45  
46  
47

### 48 **Setting and Participants**

49 A convenience sample of eighteen nursing homes in Oslo, as well as in the counties of  
50 Akershus, Oppegård and Buskerud participated. We included one hundred and seventy  
51 nursing-home residents. The inclusion criteria were the following: mild or moderate degree of  
52 dementia (defined by score of 1 or 2 on the Clinical Dementia Rating Scale),(35) age above  
53 55 years, able to stand up independently or with help from one person, able to walk six meters  
54 with or without a walking aid, and able to give informed consent. The exclusion criteria were  
55 the following: residents suffering from psychosis or severe communication problems and  
56  
57  
58  
59  
60

1 residents who were medically unstable. The nursing-home employees at participating nursing  
2 homes found suitable participants, between six and 12 persons at each nursing home. A total  
3 of 182 persons agreed to participate in the study, however eight changed their mind prior to  
4 first assessment and four participants were excluded because the inclusion criteria were not  
5 met.  
6  
7  
8  
9

### 10 **Ethical and legal considerations**

11 Verbal and written information about the study was given to the residents and their family  
12 members by their primary care giver. The participants themselves gave their written consent  
13 to participate in the study and were informed that they could refuse to participate at any stage.  
14 The Regional Committee for Medical Ethics in south east of Norway approved the RCT-  
15 study.  
16  
17  
18  
19  
20  
21

### 22 **Measurements**

23 *Depression:* Depression was measured with Cornell Scale for Depression in Dementia  
24 (CSDD), a proxy-rated scale.(36) The informants were caregivers who knew the resident well  
25 and had observed the residents for the last two weeks.(37) CSDD is valid among nursing  
26 home residents with and without dementia, and the reliability is good (Cronbach's  $\alpha$  values  
27 were 0.81 and 0.95).(38) The questionnaire consists of 19 symptom items. Each item is rated  
28 from 0 (no symptom) to 2 (severe symptom), which gives a total range = 0-38 points. The  
29 scale allows the entry "not possible to evaluate".(36) A score of 8 or more on Cornell  
30 Depression Scale classified those with depression.(38)  
31  
32  
33  
34  
35  
36  
37  
38

39 *Balance:* To measure the residents' balance we employed the Berg Balance Scale (BBS), a  
40 widely used performance-based measure of balance. The BBS consists of 14 observable tasks  
41 frequently encountered in everyday life. BBS assesses performance on a 5-level scale from 0  
42 (cannot perform) to 4 (normal performance) on 14 different movement tasks involving  
43 functional balance control, including transfer, stepping and turning.(39) The test is simple and  
44 easy to administer and is safe for the elderly to perform.(40) The total score ranges from 0 to  
45 56 and high score indicates good balance.(41) The scale has shown good intra-rater and inter-  
46 rater reliability when used with an elderly population in Norway (Cronbach's  $\alpha$  values were  
47 0.87 and 0.9).(42-43) In addition acceptable validity estimates have been reported.(44)  
48  
49  
50  
51  
52  
53  
54  
55

56 *Muscle strength:* Lower limb muscle strength was measured by the 30 seconds Chair Stand  
57 Test (CST), which equals the number of rises from the chair in 30 seconds with arms folded  
58 across the chest.(45) However, in this study the participants were allowed to use the support  
59  
60



1 of armrest when necessary.(46) The test correlates well with other functional tests such as  
2 walking speed, climbing stairs and balance.(40, 47) The 30 seconds Chair Stand Test is a  
3 valid measure of dynamic balance and functional mobility,(48) and good inter-rater reliability  
4 has been reported when used among nursing home residents with mild and moderate dementia  
5 (the intraclass correlation coefficient, ICC, was 1).(43)  
6  
7  
8  
9

10  
11 *Mobility:* Mobility/walking speed was measured by the six-meter walking test. We assessed  
12 both comfortable speed and maximum walking speed, with or without a walking aid, and the  
13 time in seconds was recorded and calculated as meters per second.(49) Good inter-rater  
14 reliability has been demonstrated when used among nursing home residents with mild and  
15 moderate dementia in Norway (ICC=0.97).(43) Walking speed is regarded as an important  
16 measure in geriatric evaluation.(50)  
17  
18  
19  
20  
21

22  
23 *Activities of daily living:* The Barthel Index (BI) was used to assess ability to perform the  
24 basic Activities of Daily Living (ADL), a widely used measure of ADL function.(51) The  
25 Barthel Index consists of 10 activities focusing on the residents' level of dependence, and the  
26 scores range from 0 (completely dependent) to 20 (independent).(52) The maximum score of  
27 20 implies that the resident independently can attend to personal hygiene, eat, get dressed, go  
28 to the bathroom, walk at least 50 m and use stairs.  
29  
30  
31  
32  
33

34  
35 *Cognition:* Clinical Dementia Rating scale (CDR) was used to rate the severity of cognitive  
36 impairment. It is a six point scale used to characterize domains of cognitive and functional  
37 performance applicable to Alzheimer's disease and related dementias.(35) Norwegian studies  
38 have shown that Clinical Dementia Rating scale is a valid substitute for a dementia  
39 assessment among nursing home residents to rate dementia and dementia severity.(53-54) The  
40 Norwegian version of Mini Mental State Examination, MMSE-NR, was used to assess global  
41 cognition. MMSE-NR consists of items concerning orientation, word registration and recall,  
42 attention, naming, reading, writing, following commands and figure copying. It can be scored  
43 between 0 and 30. High score indicates better performance.(55-56) CDR is thus a measure to  
44 rate dementia and dementia severity, while MMSE assess global cognition. As the dementia  
45 severity increases, the global cognition performance reduces.  
46  
47  
48  
49  
50  
51  
52  
53

### 54 **Demographic factors**

55 Participants' age and gender, length of stay in a nursing home (from date of admission),  
56 number of drugs, number of chronic disorders (musculoskeletal, neurological, cardiovascular  
57 and psychiatric diagnoses), use of walking aids and the residents' ability to rise from chair  
58  
59  
60

1 independently were registered. Demographic factors were extracted from the residents'  
2 journals.  
3  
4  
5

### 6 **Procedure**

7 A nurse, and often the departmental nurse, who knew the participants well and was in regular  
8 contact with him/her, performed the CDR and filled in the Case Record Form. Mostly nursing  
9 staff was familiar with the questionnaires. However, they were encouraged to contact the  
10 project leader with any questions. A specially trained-nurse or an occupational therapist  
11 performed the MMSE. Research physiotherapists performed all assessments of physical  
12 function. To ensure high inter-rater test reliability the testers took part in a training program  
13 on testing procedures before the study was initiated. Nursing home staff that knew the  
14 participants well filled out the proxy assessments, including CSDD and Barthel Index.  
15 Primary caregivers extracted information from the resident records.  
16  
17  
18  
19  
20  
21  
22  
23

### 24 **Statistics**

25 All statistical analyses were conducted with SPSS, Statistical Package for the Social Science,  
26 version 22 for Windows. Data are presented with percentages and proportions for categorical  
27 values and means with standard deviation (SD) for interval data. The t-test was applied for  
28 interval data, and the Chi-square test for categorical data to access statistical differences  
29 between groups. Correlation analyses (Pearsons'  $r$ ) were conducted to examine the  
30 associations between the variables of physical function in order to discover multicollinearity.  
31  
32  
33  
34  
35  
36  
37

38 Linear regression analyses were applied to explore bivariate and multivariate associations  
39 between Cornell Scale score and the independent variables. Each of the univariate regression  
40 models was examined separately to make sure the conditions for linear regression analysis  
41 existed. We analyzed linearity, homoscedasticity and the normal distribution of the residuals  
42 by inspecting Normal Probability Plots, different scatterplots and histograms.(57) Extreme  
43 values were examined in line with Outliers Labeling Technique.(58) We identified one extreme  
44 value based on the Cornell sumscore, two based on maximum walking speed and one based  
45 on comfortable walking speed. However, according to Pallant,(57) it is not necessary to  
46 correct for these as long as the numbers are few and the group is large enough. We considered  
47 the group to be large (N=170) and have therefore not adjusted for these in the further  
48 analyses.(57) From the unadjusted linear regression analyses we selected variables having the  
49 strongest association with the outcome ( $p < 0.05$ ) and fitted multiple linear regression models  
50 in addition to the variables of age and gender. Three different multiple linear regression  
51 models were fitted because of high correlation (multicollinearity) between the variables of  
52  
53  
54  
55  
56  
57  
58  
59  
60

1 physical performance (see table 2). BBS was included in the first model, CST in the second  
2 model and maximum walking speed was included in the third model. This measure was taken  
3 to identify a model that explained the largest proportion of the variance in the Cornell scale.  
4 To compare the strength of the associations between the various possible predictors and the  
5 main outcome (Cornell scale), we used the standardized betas from the regression models  
6 with their p-values and the adjusted coefficient of determination ( $R^2$ ).  
7  
8  
9  
10

11  
12 The CSDD is commonly used in nursing homes to distinguish between groups of depressed  
13 and not depressed. This is important in the detection and treatment of depression in persons  
14 with dementia. Because of this clinical relevance we found it necessary to perform logistic  
15 regression analysis to see if the results from logistic regression analysis differed significantly  
16 from the results of linear regression analysis. The odds ratio (OR), based on logistic  
17 regression analysis, showed the strength of association between the groups with and without  
18 depression and physical function. A score of 8 or more on CSDD classified the participants  
19 with depression.(38) Two multiple logistic regression models were fitted because of  
20 multicollinearity ( $r = 0.7$ ) between BBS and CST. In the first model BBS was included and in  
21 the second model we included CST, in addition to age and gender. The level of statistical  
22 significance was set at  $p < 0.05$  in all analyses, and all tests were two-tailed.  
23  
24  
25  
26  
27  
28  
29  
30  
31  
32  
33  
34

## 35 RESULTS

36  
37 *Sample characteristics:* Characteristics for whole sample, depressed and not depressed  
38 participants are shown in table 1. Of the 170 nursing home residents with dementia, 73.5%  
39 were woman with a mean age of 88.2 years. The mean duration of stay in nursing home for  
40 the whole sample was 2 years and 2 months, the depressed participants' stay were  
41 approximately four months longer.  
42  
43  
44  
45

46  
47 About 50% of the participants suffered from cardiovascular disease and one in five ( $n=34$ )  
48 had a psychiatric diagnosis (anxiety, depression, bipolar disorder) where the most common  
49 were anxiety and depression. Further approximately 40% was diagnosed with a  
50 musculoskeletal diagnosis and almost one in four suffered from a neurological condition. The  
51 depressed participants had significantly more psychiatric diagnoses than the not depressed  
52 ( $p=0.02$ ). Approximately 10% of the nursing home residents with dementia used a  
53 wheelchair, and 50% used a zimmer frame.  
54  
55  
56  
57  
58  
59  
60

Table 1: Characteristics for whole sample, depressed participants (Cornell Cutoff  $\geq 8$ ) and not depressed participants

|                                                                    | Number of registered (n) | Whole sample (N=170) | Range (min-max) | Depressed (n = 38) | Not depressed (n = 124) | p-value |
|--------------------------------------------------------------------|--------------------------|----------------------|-----------------|--------------------|-------------------------|---------|
| Gender, women, n (%) #                                             | 170                      | 125 (73.5)           | **              | 29 (76.3)          | 90 (72.6)               | 0.65    |
| Age in years, mean (SD)                                            | 169                      | 86.9 (7.4)           | 60 – 100        | 86.1 (7.6)         | 86.7 (7.5)              | 0.85    |
| Duration of stay in nursing home (months), mean (SD)               | 154                      | 25.7 (24.5)          | 3 – 199         | 28.7 (23.9)        | 25 (25.3)               | 0.43    |
| Number of chronic disorders, mean (SD)                             | 142                      | 3.4 (1.9)            | 0 – 11          | 3.9 (2.3)          | 3.3 (1.8)               | 0.09    |
| Number of drugs, mean (SD)                                         | 142                      | 6.4 (3.4)            | 0 – 21          | 7.3 (3.5)          | 6.1 (3.3)               | 0.09    |
| Use of walking aid, n (%) #                                        | 170                      | 118 (69.4)           | **              | 29 (76.3)          | 83 (66.9)               | 0.27    |
| Able to rise from chair independently, n (%) #                     | 168                      | 158 (92.9)           | **              | 33 (86.8)          | 118 (95.2)              | 0.04*   |
| Mini-Mental State Examination score in points, mean (SD)           | 147                      | 15.6 (4.9)           | 2 – 28          | 15.6 (5.2)         | 15.7 (4.9)              | 0.86    |
| Berg Balance Scale in points, mean (SD)                            | 166                      | 34.7 (14.0)          | 3 – 56          | 29.6 (15.7)        | 36 (13.3)               | 0.03*   |
| Bergs Cutoff 45, number in risk of falling, n (%) # $\alpha$       | 166                      | 115 (67.6)           | **              | 29 (76.3)          | 82 (66.1)               | 0.32    |
| 30 Seconds Chair Stand Test, number of rises from chair, mean (SD) | 167                      | 6.1 (3.0)            | 0 – 14          | 5.0 (3.0)          | 6.4 (3.0)               | 0.02*   |
| Comfortable walking speed in m/s, mean (SD)                        | 166                      | 0.5 (0.2)            | 0.1 – 1.4       | 0.4 (0.2)          | 0.5 (0.2)               | 0.32    |
| Maximum walking speed in m/s, mean (SD)                            | 166                      | 0.8 (0.3)            | 0.1 – 2.1       | 0.7 (0.3)          | 0.8 (0.3)               | 0.08    |
| Barthel Index in points, mean (SD)                                 | 162                      | 13.5 (3.5)           | 5 – 20          | 12.7 (3.3)         | 13.7 (3.6)              | 0.13    |
| Cornell Scale for Depression in Dementia, mean (SD)                | 162                      | 4.9 (4.6)            | 0 – 21          | 11.7 (3.6)         | 2.8 (2.1)               | 0.000*  |

Explanation of table: SD = Standard deviation, Min = minimum value, Max = maximum value, n = number of registered, N = whole sample, p = Significance level based on Independent-samples T-test between depressed and not depressed (# = Significance level based on Chi-Square-Test), \* =  $p < 0.05$ , \*\* = range as a measure is not applicable since the variable represents categorical data, gender (1 = female and 2 = male), age expressed in years, length of nursing home stay in months, diagnoses and medications given in number, the use of walking aids (0 = no and 1 = yes), able to rise from chair independently (0 = no and 1 = yes), MMSE = Mini Mental State Examination: range 0-30; low score indicates poor cognitive function, Bergs Balance Test: range 0-56; high score indicates good balance,  $\alpha$  = number in risk of falling (0 = no, score  $\geq 45$  and 1 = yes, score  $< 45$ ), (39) 30 seconds Chair Stand Test: number of rises from chair within 30 sec., comfortable and maximum walking speed in m/s; high score on the physical tests are positive (better physical function), Barthel ADL Index: range 0-20; high score indicates dependency, Cornell Scale for Depression in Dementia: range 0-38; high score indicates more depressive symptoms (0 = not depressed: Cornell score  $< 8$ , 1 = depressed: Cornell score  $\geq 8$ )

1  
2  
3  
4  
5  
6  
7  
8  
9  
10  
11  
12  
13  
14  
15  
16  
17  
18  
19  
20  
21  
22  
23  
24  
25  
26  
27  
28  
29  
30  
31  
32  
33  
34  
35  
36  
37  
38  
39  
40  
41  
42  
43  
44  
45  
46  
47  
48  
49  
50  
51  
52  
53  
54  
55  
56  
57  
58  
59  
60

*Cognition:* Regarding cognition the participants' scores on the Mini Mental State Examination ranged from 2 to 28 points. A total of 88.7% of the participants' MMSE scores fell within mild and moderate dementia (10-26 points), (59) 16 (10.9%) scored less than 10 points (indicating severe dementia) and 1.4% scored higher than 26 points. Only 56% (n=95) of the participants had a pre-existing dementia diagnosis; 23 were diagnosed with Alzheimer's disease, 18 with vascular dementia, one with subcortical dementia and one with frontotemporal dementia. A group of 52 participants did not have a specific diagnosis but were suffering from dementia according to medical records.

*Depression:* The score on CSDD ranged from 0 (n=20) to 21(n=1) points. The mean value for the whole sample was 4.9 points, and no significant gender difference was observed regarding CSDD ( $p = 0.45$ ). By applying the recommended cutoff of  $\geq 8$  on CSDD, (38) 23.5% (n=38) of the participants were classified as being depressed, and 29 (76.3%) of them were women. Only 13 participants in the depressed group had a pre-existing clinical diagnosis of mood disorder compared to 20 participants in the non-depressed group. The participants classified as not depressed were significantly better to rise from chair independently ( $p=0.04$ ). The number of chronic diseases ranged between 0 and 11, the mean number was 3.4 diagnoses (SD=1.9), and the average number of medications was 6.4 (SD=3.4). There was a statistical trend ( $p < 0.10$ ) that participants classified as depressed had more diagnoses and used more medications than the participants in the group without depression.

*Physical function:* Regarding the physical performance assessments, the mean values of the tests and standard deviations are shown in table 1. The mean score on BBS was 34.7 for the whole sample, and the scores ranged from 3 to 56 points. On average, the participants were able to stand up 6 times in 30 seconds and mean maximum walking speed was 0.8 m/s. The participants classified as depressed had significantly lower score on Bergs Balance Scale ( $p=0.03$ ) and 30 seconds Chair Stand Test ( $p=0.02$ ), indicating poorer balance function and lower limb strength compared to those without depression (Table 1). The associations between the different variables of physical function are shown in table 2. The highest correlation was found between BBS, CST and maximum walking speed, which had consequences for the further analyses (see statistics).

Table 2: Correlations between the different physical function measures and CSDD  
(The Pearsons Correlation Co-efficients)

|                                                 | <b>Bergs<br/>Balance Test<br/>(n=166)</b> | <b>Chair<br/>Stand Test<br/>(n=167)</b> | <b>Comfortable<br/>walking<br/>speed (n=166)</b> | <b>Maximum<br/>walking<br/>speed (n=166)</b> | <b>Barthel<br/>ADL Index<br/>(n=162)</b> |
|-------------------------------------------------|-------------------------------------------|-----------------------------------------|--------------------------------------------------|----------------------------------------------|------------------------------------------|
| <b>Chair Stand Test<br/>(n= 167)</b>            | 0.7<br>(p < 0.01)                         |                                         |                                                  |                                              |                                          |
| <b>Comfortable walking<br/>speed (n=166)</b>    | 0.6<br>(p < 0.01)                         | 0.7<br>(p < 0.01)                       |                                                  |                                              |                                          |
| <b>Maximum walking<br/>speed (n=166)</b>        | 0.7<br>(p < 0.01)                         | 0.7<br>(p < 0.01)                       | 0.8<br>(p < 0.01)                                |                                              |                                          |
| <b>Barthel ADL Index<br/>(n=162)</b>            | 0.7<br>(p < 0.01)                         | 0.6<br>(p < 0.01)                       | 0.5<br>(p < 0.01)                                | 0.6<br>(p < 0.01)                            |                                          |
| <b>Cornell Scale for<br/>Depression (n=162)</b> | -0.2<br>(p < 0.01)                        | -0.2<br>(p = 0.01)                      | -0.12<br>(p = 0.12)                              | -0.2<br>(p = 0.03)                           | -0.13<br>(p = 0.12)                      |

*Association between physical performance and level of depression:*

The unadjusted and adjusted linear regression analyses showed a significant relationship between depressive symptoms (CSDD score) and physical function for the variables measuring balance (BBS), muscle strength (CST) and maximum walking speed. Higher scores on the CST, BBS and maximum walking speed were associated with less depressive symptoms (Table 3).

Furthermore, the unadjusted linear regression analyses provided a statistical trend (p < 0.10) for the association between greater severity of depressive symptoms (Cornell) and more chronic diseases (p=0.09) as well as less ability to rise from chair independently (p=0.07).

1  
2  
3  
4  
5  
6  
7  
8  
9  
10  
11  
12  
13  
14  
15  
16  
17  
18  
19  
20  
21  
22  
23  
24  
25  
26  
27  
28  
29  
30  
31  
32  
33  
34  
35  
36  
37  
38  
39  
40  
41  
42  
43  
44  
45  
46  
47  
48  
49

Table 3: Unadjusted and adjusted linear regression analyses of the associations between Cornell (dependent variable) and variables measuring demographic factors, cognitive and physical performance

| Independent variables                                  | Unadjusted analysis |         |                               |             | Adjusted analysis Model 1<br><i>R</i> <sup>2</sup> = .033 |                               |             | Adjusted analysis Model 2<br><i>R</i> <sup>2</sup> = .025 |                               |             | Adjusted analysis Model 3<br><i>R</i> <sup>2</sup> = .015 |                               |             |
|--------------------------------------------------------|---------------------|---------|-------------------------------|-------------|-----------------------------------------------------------|-------------------------------|-------------|-----------------------------------------------------------|-------------------------------|-------------|-----------------------------------------------------------|-------------------------------|-------------|
|                                                        | <i>n</i>            | $\beta$ | <i>B</i><br>(95 % <i>CI</i> ) | <i>Sig.</i> | $\beta$                                                   | <i>B</i><br>(95 % <i>CI</i> ) | <i>Sig.</i> | $\beta$                                                   | <i>B</i><br>(95 % <i>CI</i> ) | <i>Sig.</i> | $\beta$                                                   | <i>B</i><br>(95 % <i>CI</i> ) | <i>Sig.</i> |
| Age in years                                           | 170                 | -0.06   | -0.61<br>(-2.21 – 0.99)       | 0.45        | -                                                         | -                             | 0.93        | -                                                         | -                             | 0.82        | -                                                         | -                             | 0.83        |
| Gender (1=women and 2=men)                             | 169                 | 0.05    | 0.03<br>(-0.07 – 0.12)        | 0.56        | -                                                         | -                             | 0.65        | -                                                         | -                             | 0.87        | -                                                         | -                             | 0.82        |
| Duration of stay in nursing home (months)              | 154                 | 0.06    | 0.01<br>(-0.02 – 0.04)        | 0.50        |                                                           |                               |             |                                                           |                               |             |                                                           |                               |             |
| Number of diagnoses                                    | 142                 | 0.15    | 0.35<br>(-0.05 – 0.76)        | 0.09        |                                                           |                               |             |                                                           |                               |             |                                                           |                               |             |
| Number of drugs                                        | 142                 | 0.11    | 0.14<br>(-0.09 – 0.37)        | 0.23        |                                                           |                               |             |                                                           |                               |             |                                                           |                               |             |
| Use of walking aid (0=no and 1=yes)                    | 170                 | 0.10    | 0.97<br>(-0.56 – 2.5)         | 0.21        |                                                           |                               |             |                                                           |                               |             |                                                           |                               |             |
| Able to rise from chair independently (0=no and 1=yes) | 168                 | 0.14    | 2.68<br>(-0.25 – 5.60)        | 0.07        |                                                           |                               |             |                                                           |                               |             |                                                           |                               |             |
| Mine-Mental State Examination (MMSE) in Points         | 147                 | -0.01   | -0.01<br>(-0.17 – 0.15)       | 0.90        |                                                           |                               |             |                                                           |                               |             |                                                           |                               |             |
| Bergs Balance Test (BBS) in Points                     | 166                 | -0.22   | -0.07<br>(-0.12 – -0.02)      | 0.005*      | -0.22                                                     | -0.07<br>(-0.12 – -0.02)      | 0.006*      |                                                           |                               |             |                                                           |                               |             |
| 30 Seconds Chair Stand Test (CST) in number            | 167                 | -0.20   | -0.30<br>(-0.53 – -0.07)      | 0.01*       |                                                           |                               |             | -0.20                                                     | -0.31<br>(-0.54 – -0.07)      | 0.01*       |                                                           |                               |             |
| Comfortable walking speed in m/s                       | 166                 | -0.12   | -3.01<br>(-6.81 – 0.80)       | 0.12        |                                                           |                               |             |                                                           |                               |             |                                                           |                               |             |
| Maximum walking speed in m/s                           | 166                 | -0.18   | -2.39<br>(-4.48 – -0.30)      | 0.03*       |                                                           |                               |             |                                                           |                               |             | -0.18                                                     | -2.38<br>(-4.56 – -0.20)      | 0.03*       |
| Barthel ADL Index in Points                            | 162                 | -0.13   | -0.16<br>(-0.36 – 0.04)       | 0.12        |                                                           |                               |             |                                                           |                               |             |                                                           |                               |             |

Explanation of table: Model 1 is not including CST and maximum walking speed because of their high correlation with BBS (r=0.7). Model 2 is not including BBS and maximum walking speed because of their high correlation with CST (r=0.7). Model 3 is not including BBS and CST because of their high correlation with maximum walking speed (r=0.7), *n* = number of registered, *R*<sup>2</sup> = adjusted coefficient of determination, *B* = Unstandardised beta, *CI* = 95% confidence interval,  $\beta$  = standardised beta, *Sig.* = levels of significance (p-value), \* = *p* < 0.05, MMSE: range 0-30; low score indicates poor cognitive function, BBS range 0-56; high score indicates good balance, 30 seconds CST: number of rises from chair within 30 sec., comfortable and maximum walking speed in m/s; high score on the physical tests are positive (better physical function), Barthel ADL Index: range 0-20; high score indicates dependency, Cornell Scale for Depression in Dementia: range 0-38; high score indicates more depressive symptoms

*Associations between physical function and being depressed or not being depressed:*

The unadjusted and adjusted logistic regression analyses revealed significant differences between the groups classified as depressed (Cornell  $\geq 8$ ) and not depressed in terms of the variables measuring balance (BBS) and muscle strength (CST). High scores on the physical tests reduced the likelihood of being depressed. One-unit increase in sumscore on BBS decreased the odds ratio (OR) by 3.2% and one increase in number of rises on CST decreased the OR by 15.2% for being classified as depressed adjusted for gender and age (Table 4).

Table 4: Logistic unadjusted and adjusted regression analyses of the strength of associations between the groups with depression (Cornell  $\geq 8$ ) and without depression (Cornell  $< 8$ ) and variables measuring demographic factors, cognitive and physical performance

| Independent variables                                  | Unadjusted analysis |                      |       | Adjusted analysis Model 1 |                     |       | Adjusted analysis Model 2 |                     |       |
|--------------------------------------------------------|---------------------|----------------------|-------|---------------------------|---------------------|-------|---------------------------|---------------------|-------|
|                                                        | B                   | OR (95% CI)          | Sig.  | B                         | OR (95% CI)         | Sig.  | B                         | OR (95% CI)         | Sig.  |
| Age in years                                           | -0.20               | 0.822 (0.35 – 1.91)  | 0.65  | -0.02                     | 0.983 (0.93 – 1.04) | 0.51  | -0.01                     | 0.988 (0.94 – 1.04) | 0.65  |
| Gender (1=women and 2=men)                             | -0.01               | 0.995 (0.95 – 1.05)  | 0.85  | -0.27                     | 0.765 (0.31 – 1.92) | 0.57  | -0.10                     | 0.907 (0.37 – 2.25) | 0.83  |
| Duration of stay in nursing home (months)              | 0.01                | 1.006 (0.99 – 1.02)  | 0.43  |                           |                     |       |                           |                     |       |
| Number of diagnoses                                    | 0.17                | 1.183 (0.97 – 1.44)  | 0.09  |                           |                     |       |                           |                     |       |
| Number of drugs                                        | 0.10                | 1.104 (0.98 – 1.24)  | 0.09  |                           |                     |       |                           |                     |       |
| Use of walking aid (0=no and 1=yes)                    | 0.47                | 1.592 (0.69 – 3.67)  | 0.28  |                           |                     |       |                           |                     |       |
| Able to rise from chair independently (0=no and 1=yes) | 1.27                | 3.576 (0.98 – 13.10) | 0.054 |                           |                     |       |                           |                     |       |
| Mini-Mental State Examination in Points                | -0.01               | 0.993 (0.92 – 1.07)  | 0.86  |                           |                     |       |                           |                     |       |
| Bergs Balance Test in Points                           | -0.03               | 0.969 (0.95 – 0.99)  | 0.02* | -0.03                     | 0.968 (0.94 – 0.99) | 0.01* |                           |                     |       |
| 30 Seconds Chair Stand Test in number                  | -0.16               | 0.853 (0.75 – 0.97)  | 0.02* |                           |                     |       | -0.16                     | 0.848 (0.74 – 0.97) | 0.02* |
| Comfortable walking speed in m/s                       | -1.08               | 0.340 (0.04 – 2.77)  | 0.31  |                           |                     |       |                           |                     |       |
| Maximum walking speed in m/s                           | -1.07               | 0.342 (0.10 – 1.14)  | 0.08  |                           |                     |       |                           |                     |       |
| Barthel Index in Points                                | -0.08               | 0.924 (0.83 – 1.03)  | 0.14  |                           |                     |       |                           |                     |       |

Explanation of table: Model 1 is not including CST because of high correlation with BBS ( $r=0.7$ ). Model 2 is not including BBS because of high correlation with CST ( $r=0.7$ ), *B* = Unstandardised beta, *OR* = Odd ratio, *CI* = 95% confidence interval, *Sig.* = levels of significance (p-value), \* =  $p < 0.05$ , MMSE: range 0-30; low score indicates poor cognitive function, BBS range 0-56; high score indicates good balance, 30 seconds CST: number of rises from chair within 30 sec., comfortable and maximum walking speed in m/s; high score on the physical tests are positive (better physical function), Barthel ADL Index: range 0-20; high score indicates dependency, CSDD: range 0-38: 0 = not depressed: Cornell score  $< 8$ , 1 = depressed: Cornell score  $\geq 8$

Furthermore the unadjusted logistic regression analysis provided a statistical trend,  $p < 0.10$ , were the group with depression had multiple diagnoses and used more medications ( $p = 0.09$ ),



1  
2  
3 had a lower maximum walking speed ( $p = 0.08$ ) and were less able to rise from chair  
4 independently ( $p = 0.05$ ), compared to the group without depression.  
5  
6

## 7 8 **DISCUSSION**

9  
10 Nursing home residents with dementia are a heterogeneous group in terms of physical  
11 function and depression. By applying the recommended cutoff of  $\geq 8$  on CSDD, 23.5% of the  
12 participants were classified as being depressed. Large differences in physical and mental  
13 health among institutional residents have also been underlined by other authors,(19, 40, 60) as  
14 well as the prevalence of depression in nursing home residents with dementia.(6, 9, 19, 61) A  
15 Swedish study among persons aged 85 and over showed a 27% prevalence of depression in  
16 general but a 42% prevalence among those living in institutions.(7) Studies have shown that  
17 depression among those in residential care is associated with decreased cognitive status,  
18 functional capacity, clinician-rated health,(62) and increased mortality.(63) The common  
19 comorbidity of depression and dementia further increases risks of functional disability and  
20 nursing home admissions.(64)  
21  
22  
23  
24  
25  
26  
27  
28

29  
30 Our results revealed significant associations between higher scores on the CSDD, indicating  
31 more symptoms of depression, and lower scores on BBS ( $p=0.006$ ), 30 seconds CST  
32 ( $p=0.001$ ) as well as maximum walking speed ( $p=0.003$ ), indicating lower level of physical  
33 function. This corresponds well with the notion that high level of physical activity is  
34 associated with preservation of physical function in daily life,(22, 27, 65-67) and a low  
35 prevalence of depressive symptoms.(16-17) Further, with the exception of walking speed, the  
36 differences in physical function remained significant between the groups classified as  
37 depressed (CSDD  $\geq 8$ ) and not depressed (CSDD  $< 8$ ) in the logistic regression analyses. The  
38 findings confirmed our assumption that depression and depressive symptoms among nursing  
39 home residents with dementia are significantly associated with functional performance.  
40  
41  
42  
43  
44  
45  
46  
47

48 Our findings regarding age, gender and duration of stay in nursing home corresponded well  
49 with results from similar studies and reports among nursing home residents.(40, 68-71)  
50 Depression is a complex phenomenon in terms of causes and symptoms.(72) The adjusted  
51 determination coefficient ( $R^2$ ) was low, and approximately the same, in all three models  
52 (Table 3) indicating that depression is a complex phenomenon. Overall our results underline  
53 the fact that depression has many explanatory mechanisms. Physical function alone cannot  
54 explain depression, although there are significant associations.(73)  
55  
56  
57  
58  
59  
60

1  
2  
3 We found no significant associations between ADL-function and depression, which is in line  
4 with the study of Barca and colleagues,(9) and in contrast to other studies.(8, 29) However,  
5 the Barthel Index is a proxy-reported measurement, and may not be sensitive enough to  
6 identify the true abilities of an individual.(30) The readiness of the nursing home staff to  
7 assist as well as the institutionalization of the residents may influence the scores on Barthel  
8 Index. Our study showed no significant associations between depression and the degree of  
9 cognitive impairment. This is in line with another study that included participants with  
10 dementia,(74) but it is inconsistent with results from a study that included both cognitively  
11 intact and dementia sufferers.(9)  
12  
13  
14  
15  
16  
17  
18  
19

20 Several factors can influence physical function. Psychotropic medications, benzodiazapines or  
21 antipsychotic medications may affect balance and physical functioning. Inactivity, the  
22 precursor for reduced physical function, can be a direct result of depression as common  
23 symptoms are lack of interest in activities and loss of energy.(6,8,12) Unfortunately, there are  
24 no available data on the types of medications that the participating residents used. The  
25 category “chronic disorders” embraces musculoskeletal diagnoses, cardiovascular disorders,  
26 psychiatric diagnoses and co-morbid neurological conditions such as for example epilepsy,  
27 stroke, and Parkinson`s Disease. These are all disorders that can affect balance and physical  
28 function. However there were no significant differences between the group of depressed and  
29 not depressed regarding musculoskeletal, neurological or cardiovascular diagnoses. Depressed  
30 participants had significantly more psychiatric diagnoses than the not depressed ( $p = 0.02$ ),  
31 which were expected considering depression was included in this category.  
32  
33  
34  
35  
36  
37  
38  
39  
40

41 When more than one statistical test is conducted in analysing data from clinical studies, some  
42 demand that a more stringent criterion should be used for statistical significance than the  
43 conventional  $p < 0.05$ . However according to Perneger and coworkers adjustments for  
44 multiple tests (Bonferroni adjustments) creates more problems than it solves. They state that  
45 simply describing what tests of significance that have been performed, and why, is generally  
46 the best way of dealing with multiple comparisons.(75) Although we have conducted several  
47 tests, we have therefore not performed adjustments for statistical significance (the Bonferroni  
48 method), but recommend reflective and cautious interpretation of the results. There are some  
49 variables missing from the dataset. Regarding the physical tests, the main reason for this is the  
50 fact that the residents were not available in the testing moment the specific day. Some  
51 residents were not capable of performing the MMSE test because of hearing and vision  
52  
53  
54  
55  
56  
57  
58  
59  
60

1  
2  
3 impairment. The MMSE measurement is sensitive to factors like education level, age, sensory  
4 impairment, literacy problems, lack of motivation, impaired vision and hearing and depressive  
5 disorders.(56) These factors may also explain the lack of correlation with depression in this  
6 study.  
7  
8  
9

### 10 11 **Strength and limitations of the study**

12 The study included a well-defined population of older nursing homes residents with mild and  
13 moderate dementia defined by score of 1 or 2 on the Clinical Dementia Rating Scale.(35) The  
14 inclusion criteria made it possible to include participants with a broad range of mental and  
15 functional capacities. In addition, the study population seems to represent nursing home  
16 residents with respect to age and gender, which is a further strength.(40, 69) Measuring  
17 instruments employed in this study are standardized and commonly used in clinical practice  
18 among frail elderly in nursing homes.  
19  
20  
21  
22  
23  
24  
25

26 The present study has several limitations. The participants were enrolled in a physical  
27 exercise intervention trail (EXDEM), so they were likely to be fitter and maybe more  
28 motivated than those who would not have agreed to be part of the intervention. In addition,  
29 due to safety and the importance of the participants receiving instruction during exercise, the  
30 residents with severe communication problems were excluded. Because of this, the  
31 associations revealed in this study may not be applicable to the overall population of nursing  
32 home residents with dementia. Many of the participants in our study did not have a prior  
33 dementia diagnosis. All the residents had been assessed by CDR, a commonly used  
34 instrument in nursing homes. It is important to underline that one single instrument is not as  
35 accurate as a clinical diagnosis, which implies the possibility that some participants may have  
36 been wrongly diagnosed with dementia.(76) However, the CDR score have been found to be  
37 in agreement with the golden standard of dementia diagnosis.(77) According to score on  
38 CDR all the residents were suffering from mild and moderate dementia. However, on MMSE  
39 11% scored lower than 10 points, which may indicate severe dementia. This means that 16  
40 participants may have been wrongly categorized as sufferers of mild/moderate dementia,  
41 which may have influenced the results. Drugs and diagnoses were to be reported in the case  
42 report. Regretfully, some of the designated health care workers failed to complete the case  
43 report. This resulted in lacking information about drugs and diagnoses in some cases, which  
44 could be of importance regarding the interpretation of the results. Because of the cross-  
45 sectional design of the study we cannot draw conclusions about causality.  
46  
47  
48  
49  
50  
51  
52  
53  
54  
55  
56  
57  
58  
59  
60

1  
2  
3 Despite the limitations, the study represent important information about associations between  
4 depression and physical function in a population of elderly nursing home residents with mild  
5 to moderate dementia.  
6  
7

## 8 9 10 **CONCLUSION**

11 Our study has shown that nursing home residents with good physical function (balance,  
12 muscle strength and walking speed) experienced less depressive symptoms. Depression is  
13 complex and a multi-causal disorder. However, the implications of this study emphasize that  
14 physical activity is important for maintaining physical function for this vulnerable group and  
15 should at least be part of an intervention to improve depressive symptoms. Further studies  
16 should investigate possible methods how to motivate nursing home residents to participate in  
17 physical activity and how health workers in nursing home might contribute to improve  
18 physical functioning and hence possibly decrease depressive symptoms in nursing home  
19 residents. The potential interaction of dementia with poor physical function and depression  
20 indicates an area to explore in future epidemiological studies with a prospective design.  
21  
22  
23  
24  
25  
26  
27  
28  
29

### 30 **Author Affiliations**

- 31 1 Faculty of Health Sciences, Department of Physiotherapy, Oslo and Akershus  
32 University College of Applied Sciences, Oslo, Norway
- 33 2 Ryen Helsehus / Short-term rehabilitation, Nursing Home Agency, Oslo, Norway
- 34 3 Norwegian National Advisory Unit on Ageing and Health, Vestfold Hospital Trust  
35  
36  
37  
38  
39

40 **Contributors:** LAHK, AB and EWT participated in contribution to the design of the study,  
41 accountability for all aspects of the work and approval of the published version. LAHK was  
42 involved in drafting of the work. AB and EWT were responsible for revising the work.  
43  
44  
45

46 **Funding:** The Norwegian Fund for Post-Graduate Training in Physiotherapy funded this  
47 work, and the support of this organization is gratefully acknowledged. The Norwegian Extra  
48 Foundation for Health and Rehabilitation has made the original project possible.  
49  
50  
51  
52

53 **Competing interests:** The authors declare no conflicts of interest.  
54  
55

56 **Patient consent:** Obtained.  
57  
58  
59  
60

**Ethics approval:** The Regional Committee for Medical Ethics in Norway, reference number: 2012/1150, approved the study.

**Data sharing statement:** No additional data are available.

**Twitter:** Follow Linda Kvæl at @lindakvael

## REFERENCES

1. Prince, M, Bryce, R, Albanese, E, et al. The Globale Prevalence of Dementia: A systematic Review and Metaanalysis. *Alzheimers Dement*. 2013;9(1):63-75.
2. Seitz, D, Purandare, N and Conn, D. Prevalence of psychiatric disorders among older adults in long-term care homes: a systematic review. *Int Psychogeriatr*. 2010;22(7):1025-39.
3. Lithgow, S, Jackson, G.A and Browne, D. Estimating the prevalence of dementia: cognitive screening in Glasgow nursing homes. *Int J Geriatr Psychiatry*. 2012;27(8):785-91.
4. Cheng, S-T, Lam, L.C and Chow, P.K. Under-recognition of dementia in long-term care homes in Hong Kong. *Aging Ment Health*. 2012;16(4):516-20.
5. Cherubini, A, Ruggiero, C, Dell'Aquila, G, et al. Underrecognition and Undertreatment of Dementia in Italian Nursing Homes. *J Am Med Dir Assoc*. 2012;13(8):113-19.
6. Selbæk, G, Kirkevold, Ø and Engedal, K. The prevalence of psychiatric symptoms and behavioural disturbances and the use of psychotropic drugs in Norwegian Nursing homes. *Int J Geriatr Psychiatry*. 2007;22(9):843-49.
7. Bergdahl, E, Allard, P and Gustafson, Y. Depression among very old with dementia. *Int Psychogeriatr*. 2011;23(5):756-63.
8. Mjørud, M, Engedal, K, Barca, M.L, et al. Livskvalitet, depressive symptomer og funksjonssvikt hos personer med demens. *Sykepleien Forskning*. 2011;6(2):178-86.
9. Barca, M.L, Selbæk, G, Laks, J, et al. Factors associated with depression in Norwegian nursing homes. *Int J Geriatr Psychiatry*. 2009;24(4):417-25.
10. World Health Organization. [Online] Health Topics, Depression [Cited: Mars 25., 2016.] [www.who.int/topics/depression/en/](http://www.who.int/topics/depression/en/)
11. Djernes, J.K. Prevalence and predictors of depression in populations of elderly: a review. *Acta Psychiatr Scand*. 2006;113(5):372-87.
12. Jongenelis, K, Pot, A.M, Eisses, A.M, et al. Prevalence and risk indicators of depression in elderly nursing home patients: the AGED study. *J Affect Disord*. 2004;83(2-3):135-42.
13. Djernes, J.K, Gulmann, N.C, Foldgaer, L, et al. 13 year follow up of morbidity, mortality and use of health services among elderly depressed patients and general elderly populations. *Aust N Z J Psychiatry*. 2011;45(8):654-62.
14. Kitwood, T. Understanding senile dementia: a psychobiographical approach. *Free Associations*. 1990;19:60-75.
15. World Health Organization. [Online] Media Centre, Depression, fact sheets. [Cited: Mars 25., 2016.] <http://www.who.int/mediacentre/factsheets/fs369/en/>
16. Fukukawa, Y, Nakashima, C, Tsuboi, S, et al. Age differences in the effect of physical activity on depressive symptoms. *Psychol Aging*. Jnu 2004;19(2):346-51.
17. Barbour, K.A, Edenfield, T.M and Blumenthal, J.A. Exercise as a treatment for depression and other psychiatric disorders: a review. *J Cardiopulm Rehabil Prev*. 2007;27(6):359-67.
18. Windle, G, et al. Is exercise effective in promoting mental well-being in older age? A systematic review. *Aging Ment Health*. 2010;14(6):652-69.
19. Telenius, E.W, Engedal, K and Bergland, A. Physical Performance and Quality of Life of Nursing-Home Residents with Mild and Moderate Dementia. *Int J Environ Res Public Health*. 2013;10(12):6672-86.

- 1  
2  
3  
4  
5  
6  
7  
8  
9  
10  
11  
12  
13  
14  
15  
16  
17  
18  
19  
20  
21  
22  
23  
24  
25  
26  
27  
28  
29  
30  
31  
32  
33  
34  
35  
36  
37  
38  
39  
40  
41  
42  
43  
44  
45  
46  
47  
48  
49  
50  
51  
52  
53  
54  
55  
56  
57  
58  
59  
60
20. **Kolanowski, A, Buettner, L, Litaker, M, et al.** Factors that relate to activity engagement in nursing home residents. *Am J Alzheimers Dis Other Demen.* 2006;21(1):15-22.
21. **Forbes, D, Forbes, S.C, Blake C.M, et al.** [Online] Exercise programs for people with dementia (Review). *Cochrane Library.* 2015. <http://onlinelibrary.wiley.com/doi/10.1002/14651858.CD006489.pub4/epdf>
22. **Singh, M.A.** Exercise comes of age. Rationale and recommendations for a geriatric exercise prescription. *J Gerontol A Biol Sci Med Sci.* 2002;57(5):262-82.
23. **Helbostad, J.L.** Physical training for nursing home residents - has it any effect? *Tidsskr Nor Laegeforen.* 2005;125(9):1195-97.
24. **Nelson, M.E, Rejeski, W.J, Blair, S.N, et al.** Physical activity and public health in older adults: recommendations from the American College of Sports Medicine and the American Heart Association. *Med Sci Sports Exerc* 2007;39(8):1435-45.
25. **Rolland, Y, Pillard, F, Klapouszczak, A, et al.** Exercise Program for Nursing Home Residents with Alzheimer's Disease: A 1-Year Randomized Controlled Trial. *J Am Geriatr Soc.* 2007;55(2):158-65.
26. **American College of Sports Medicine, Chodzko-Zajko, W.J, Proctor, D.N, et al.** American College of Sports Medicine Position stand. Exercise and physical activity for older adults. *Med Sci Sports Exerc.* 2009; 41(7):1510-30.
27. **Weening-Dijksterhuis, E, de Greef, M.H, Scherder, E.J, et al.** Frail institutionalized older persons: A comprehensive review on physical exercise, physical fitness, activities of daily living, and quality-of-life. *Am J Phys Med Rehabil.* 2011;90(2):156-68.
28. **Grønstedt, H.** Individually tailored physical and daily activities for residents in nursing home settings - A Scandinavian multi-centre study (Phd-thesis) Stockholm: Karolinska institutet, 2013.
29. **Kaup, B.A, Loreck, D, Gruber-Baldini, A.L, et al.** Depression and Its Relationship to Function and medical Status, By Dementia Status, in Nursing Home Admissions. *Am J Geriatr Psychiatry.* 2007;15(5)438-42.
30. **Brach, J.S, VanSwearingen, J.M, Newman, A.B, et al.** Identifying early decline of physical function in community-dwelling older women: Performance-based and self-report measures. *Phys Ther* 2002;82(4):320-28.
31. **Borza, T, Engedal, K, Bergh, S, et al.** The course of depressive symptoms as measured by the Cornell Scale for Depression in Dementia over 74 months in 1158 nursing home residents. *J Affect Disord.* 2015; 175:209-16.
32. **Lolk, A and Andersen, K.** Prevalence of depression and dementia among nursing home residents. *Ugeskr Laeger.* 2015;177(12) V:11140591.
33. **Løvheim, H, Sandman, P.O, Kallin, K, et al.** Relationship between antipsychotic drug use and behavioral and psychological symptoms of dementia in old people with cognitive impairment living in geriatric care. *Int Psychogeriatr.* 2006;18(4):713-26.
34. **Olsen, C, Pedersen, I, Bergland, A, et al.** Effect of animal-assisted interventions on depression, agitation and quality of life in nursing home residents suffering from cognitive impairment or dementia: a cluster randomized controlled trial. *Int J Geriatr Psychiatry.* 2016;31(12):1312-21.
35. **Hughes, C.P, Berg, L, Danziger, W.L, et al.** A new clinical scale for the staging of dementia. *Br J Psychiatry.* 1982;140:566-72.
36. **Alexopoulos, G.S, Abrams, R.C, Young, R.C, et al.** Cornell Scale for Depression in Dementia. *Biol Psychiatry.* 1988;23(3):271-84.
37. **Barka, M.L, Selbaek, G, Laks, J, et al.** The pattern of depressive symptoms and factor analysis of the Cornell Scale among patients in Norwegian Nursing homes. *Int J Geriatr Psychiatry.* 2008;23(10):1058-65.
38. **Barca, M.L, Engedal, K and Selbaek, G.** A reliability and validity study of the Cornell Scale among elderly inpatients, using various clinical criteria. *Dement Geriatr Cogn Disord.* 2010;29(5):438-47.
39. **Berg, K, Wood-Dauphine, S, Willims, J.I, et al.** Measuring balance in the elderly: Preliminary development of an instrument. *Physiotherapy Canada.* 1989;41(6):304-11.
40. **Bergland, A, Narum, I, Grønstedt, H, et al.** Evaluating the feasibility and the intercorrelation of measurements on the functioning of residents living in Scandinavian nursing homes. *Physical & Occupational Therapy in Geriatrics.* 2010;28(2):154-69.
41. **Bogle Thorbahn, L.D and Newton, R.A.** Use of the Berg Balance test to predict falls in elderly persons. *Phys Ther.* 1996;76(6):576-83.
42. **Halsaa, K.E, Brovold, T, Graver, V, et al.** Assessments of interrater reliability and internal consistency of the Norwegian version of the Berg Balance Scale. *Arch Phys Med Rehabil.* 2007;88(1):94-98.
43. **Telenius, E.W, Engedal, K and Bergland, A.** [Online] Inter-rater reliability of the Bergs Balance Scale, 30s chair stands test and 6 m walking test, and construct validity of the Bergs Balance Scale in nursing home residents with mild-to-moderate dementia. *BMJ Open Rehabilitation Medicine.* 2015;5(9) <http://dx.doi.org/10.1136/bmjopen-2015-008321>

- 1  
2  
3  
4  
5  
6  
7  
8  
9  
10  
11  
12  
13  
14  
15  
16  
17  
18  
19  
20  
21  
22  
23  
24  
25  
26  
27  
28  
29  
30  
31  
32  
33  
34  
35  
36  
37  
38  
39  
40  
41  
42  
43  
44  
45  
46  
47  
48  
49  
50  
51  
52  
53  
54  
55  
56  
57  
58  
59  
60
44. **Conradsson, M, Lundin-Olsson, L, Lindelöf, N, et al.** Berg balance scale: intrarater test-retest reliability among older people dependent in activities of daily living and living in residential care facilities. *Phys Ther.* 2007;87(9):1155-63.
45. **Rikli, R and Jones, C.J.** *Senior Fitness Test Manual Second edition.* Copenhagen: FADL's forlag, 2013.
46. **Telenius, E.W, Engedal, K and Bergland, A.** Effect of a high-intensity exercise program on physical function and mental health in nursing home residents with dementia: an assessor blind randomized controlled trial. *PLoS One.* 2015;10(5):e0126102.
47. **Csuka, M and McCarty, D.J.** Simple method for measurement of lower extremity muscles strength. *Am J Med.* 1985;78(1):77-81.
48. **Goldberg, A, Chavis, M, Watkins, J, et al.** The five-times-sit-to-stand test: validity, reliability and detectable change in older females. *Aging Clin Exp Res.* 2012;24(4):339-44.
49. **Studenski, S, Perera, S, Wallace, D, et al.** Physical performance measures in the clinical setting. *J Am Geriatr Soc.* 2003;51(3):314-22.
50. **Peel, N.M, Kuys, S.S and Klein, K.** Gait speed as a Measure in Geriatric Assessment in Clinical Settings: A systematic Review. *J Gerontol A Biol Sci Med Sci.* 2013;68(1):39-46.
51. **Mahoney, F.I and Barthel, D.W.** Functional evaluation. The Barthel Index. *Md State Med J.* 1965;14:61-65.
52. **Collin, C, Wade, D.T, Davies, S, et al.** The Barthel ADL Index: a reliability study. *Int Disabil Stud.* 1988;10(2):61-63.
53. **Engedal, K and Haugen, P.K.** The prevalence of dementia in a sample of elderly Norwegian. *Int J Geriatr Psychiatry.* 1993;8(7):565-70.
54. **Nygaard, H.A and Ruths, S.** Missing the diagnosis: Senile dementia in patients admitted to nursing homes. *Scand J Prim Health Care.* 2003;21(3):148-52.
55. **Folstein, M.F, Folstein, S.E and McHugh, P.R.** "Mini-Mental State". A practical method for grading the cognitive state of patients for the clinician. *J Psychiatr Res.* 1975;12(3):189-98.
56. **Strobel, C and Engedal, K.** *MMSE-NR. Norsk Revidert Mini Mental Status Evaluering. Revidert og utvidet manual.* Oslo: Nasjonalt Kompetansesenter for Aldring og Helse, 2008.
57. **Pallant, J.** *SPSS Survival manual. A step by step guide to data analysis using SPSS. 4 th edition:* Allen & Unwin Book Publisher, 2010.
58. **Hogalin, D.C, Iglewicz, B and Tukey, J.W.** Performance of some resistant rules for outlier labeling. *Journal of American Statistical Association.* 1986;81(396):991-99.
59. **Kukull, W.A, Larson, E.B, Teri, L, et al.** The mini-mental state examination score and the clinical diagnosis of dementia. *J Clin Epidemiol.* 1994;47(9):1061-67.
60. **Frandin, K, Borell, L, Grönstedt, H, et al.** A nordic multi-center study on physical and daily activities for residents in nursing home setting: design of a randomized, controlled trial. *Aging Clin Exp Res.* Aug 2009;21(4-5):314-22.
61. **Rosenvinge, B.H and Rosenvinge, J.H.** Occurrence of depression in the elderly - a systematic review of 55 prevalence studies from 1990-2001. *Tidsskr Nor Laegeforen.* 2003;123(7):928-29.
62. **Katz, I.R, Simpson, G.M, Curlik, S.M, et al.** Pharamlogical treatment of major depression for elderly patients in residential care settings. *J Clin Psychiatry.* 1990;51:41-48.
63. **Rovner, B.W, German, P.S, Brant, L.J, et al.** Depression and mortality in nursing homes. *JAMA.* 1991;265(8):993-96.
64. **Kales, H.C, Chen, P, Blow, F.C, et al.** Rates of clinical depression diagnosis, functional impairment, and nursing home placement in coexisting dementia and depression. *Am J Geriatr Psychiatry.* 2005;13(6):441-49.
65. **Heyn, P, Abreu, B.C and Ottenbacher, K.J.** The effects of exercise training on elderly persons with cognitive impairment and dementia: a meta-analysis. *Arch Phys Med Rehabil.* 2004;85(10):1694-1704.
66. **Chin, A, Paw, M.J, van Uffelen, J.G, et al.** The functional effects of physical exercise training in frail older people: a systematic review. *Sports Med.* 2008;38(9):781-93.
67. **Forster, A, Lambley, R, Hardy, J, et al.** [Online] Rehabilitation for older people in long-term care (Review). *Cochrane Database Syst Rev.* 2009;21(1) <http://onlinelibrary.wiley.com/doi/10.1002/14651858.CD004294.pub2/epdf>
68. **Wolter, L.L and Studenski, S.A.** A clinical synthesis of falls intervention trials. *Top Geriatr Rehabil.* 1996;11(3):9-19.
69. **Barca, M.L, Engedal, K, Laks, J, et al.** Quality of life among elderly patients with dementia in institutions. *Dement Geriatr Cogn Disord.* 2011;31(6):435-42.
70. **Grönstedt, H, Hellström, K, Bergland, A, et al.** Functional level, physical activity and wellbeing in nursing home residents in three Nordic countries. *Ageing Clinical and Experimental Research.* 2011;23(5):413-20.

- 1  
2  
3 71. Statistisk Sentralbyrå. *Eldres bruk av helse- og omsorgstjenester*. Ramm, J (red). Oslo: 2013.
- 4 72. Iden, K.R. *Depresjon i sykehjem - underdiagnostikk og overbehandling*. Avhandling for graden philosophiae doctor  
5 (PhD): Universitetet i Bergen, 2015.
- 6 73. Bjørndal, A and Hofoss, D. *Statistikk for helse- og sosialfagene*. Oslo: Gyldendal Akademisk, 2010.
- 7 74. Verkaik, R, Nuyen, J, Schellevis, J, et al. The relationship between severity of Alzheimer's disease and prevalence of  
8 comorbid depressive symptoms and depression: a systematic review. *Int J Geriatr Psychiatry*. 2007;22(11):534-42.
- 9 75. Perneger, Y.V. What's wrong with Bonferroni adjustments. *BMJ*. 1998;316(7139):1236-38.
- 10 76. Palm, R, Jünger, S, Reuther, S, et al. People with dementia in nursing home research: a methodological review of the  
11 definition and identification of the study population. *BMC Geriatr*. 2016;16(78) doi:10.1186/s12877-016-0249-7
- 12 77. Chaves, M.L, Camozzato, A.L, Godinho, C, et al. Validity of the clinical dementia rating scale for the detection and  
13 staging of dementia in Brazilian patients. *Alzheimers Dis Assoc Disord*. 2007;21(3):210-17.
- 14  
15  
16  
17  
18  
19  
20  
21  
22  
23  
24  
25  
26  
27  
28  
29  
30  
31  
32  
33  
34  
35  
36  
37  
38  
39  
40  
41  
42  
43  
44  
45  
46  
47  
48  
49  
50  
51  
52  
53  
54  
55  
56  
57  
58  
59  
60



STROBE 2007 (v4) Statement—Checklist of items that should be included in reports of *cross-sectional studies*

| Section/Topic             | Item # | Recommendation                                                                                                                                                                       | Reported on page # |
|---------------------------|--------|--------------------------------------------------------------------------------------------------------------------------------------------------------------------------------------|--------------------|
| Title and abstract        | 1      | (a) Indicate the study’s design with a commonly used term in the title or the abstract                                                                                               | Page 1             |
|                           |        | (b) Provide in the abstract an informative and balanced summary of what was done and what was found                                                                                  | Page 2             |
| <b>Introduction</b>       |        |                                                                                                                                                                                      | Page 4-5           |
| Background/rationale      | 2      | Explain the scientific background and rationale for the investigation being reported                                                                                                 | Page 4-5           |
| Objectives                | 3      | State specific objectives, including any prespecified hypotheses                                                                                                                     | Page 5             |
| <b>Methods</b>            |        |                                                                                                                                                                                      | Page 5-9           |
| Study design              | 4      | Present key elements of study design early in the paper                                                                                                                              | Page 5             |
| Setting                   | 5      | Describe the setting, locations, and relevant dates, including periods of recruitment, exposure, follow-up, and data collection                                                      | Page 5-6           |
| Participants              | 6      | (a) Give the eligibility criteria, and the sources and methods of selection of participants                                                                                          | Page 5-6           |
| Variables                 | 7      | Clearly define all outcomes, exposures, predictors, potential confounders, and effect modifiers. Give diagnostic criteria, if applicable                                             | Page 6-8           |
| Data sources/ measurement | 8*     | For each variable of interest, give sources of data and details of methods of assessment (measurement). Describe comparability of assessment methods if there is more than one group | Page 6-8           |
| Bias                      | 9      | Describe any efforts to address potential sources of bias                                                                                                                            | Page 8 and 16-17   |
| Study size                | 10     | Explain how the study size was arrived at                                                                                                                                            | Page 5-6           |
| Quantitative variables    | 11     | Explain how quantitative variables were handled in the analyses. If applicable, describe which groupings were chosen and why                                                         | Page 8-9 and 16    |
| Statistical methods       | 12     | (a) Describe all statistical methods, including those used to control for confounding                                                                                                | Page 8-9           |
|                           |        | (b) Describe any methods used to examine subgroups and interactions                                                                                                                  | Page 8-9           |
|                           |        | (c) Explain how missing data were addressed                                                                                                                                          | Page 16-17         |
|                           |        | (d) If applicable, describe analytical methods taking account of sampling strategy                                                                                                   | Page 8-9           |
|                           |        | (e) Describe any sensitivity analyses                                                                                                                                                | Page 8-9           |
| <b>Results</b>            |        |                                                                                                                                                                                      | Page 9-15          |

1  
2  
3  
4  
5  
6  
7  
8  
9  
10  
11  
12  
13  
14  
15  
16  
17  
18  
19  
20  
21  
22  
23  
24  
25  
26  
27  
28  
29  
30  
31  
32  
33  
34  
35  
36  
37  
38  
39  
40  
41  
42  
43  
44  
45  
46  
47  
48  
49

|                          |     |                                                                                                                                                                                                                                                                                                                                                                                                               |                       |
|--------------------------|-----|---------------------------------------------------------------------------------------------------------------------------------------------------------------------------------------------------------------------------------------------------------------------------------------------------------------------------------------------------------------------------------------------------------------|-----------------------|
| Participants             | 13* | (a) Report numbers of individuals at each stage of study—eg numbers potentially eligible, examined for eligibility, confirmed eligible, included in the study, completing follow-up, and analysed<br>(b) Give reasons for non-participation at each stage<br>(c) Consider use of a flow diagram                                                                                                               | Page 5-6              |
| Descriptive data         | 14* | (a) Give characteristics of study participants (eg demographic, clinical, social) and information on exposures and potential confounders<br>(b) Indicate number of participants with missing data for each variable of interest                                                                                                                                                                               | Page 9-10<br>Page 10  |
| Outcome data             | 15* | Report numbers of outcome events or summary measures                                                                                                                                                                                                                                                                                                                                                          | Page 11               |
| Main results             | 16  | (a) Give unadjusted estimates and, if applicable, confounder-adjusted estimates and their precision (eg, 95% confidence interval). Make clear which confounders were adjusted for and why they were included<br>(b) Report category boundaries when continuous variables were categorized<br>(c) If relevant, consider translating estimates of relative risk into absolute risk for a meaningful time period | Page 12-13<br>Page 14 |
| Other analyses           | 17  | Report other analyses done—eg analyses of subgroups and interactions, and sensitivity analyses                                                                                                                                                                                                                                                                                                                | Page 12               |
| <b>Discussion</b>        |     |                                                                                                                                                                                                                                                                                                                                                                                                               | Page 15-18            |
| Key results              | 18  | Summarise key results with reference to study objectives                                                                                                                                                                                                                                                                                                                                                      | Page 15               |
| Limitations              | 19  | Discuss limitations of the study, taking into account sources of potential bias or imprecision. Discuss both direction and magnitude of any potential bias                                                                                                                                                                                                                                                    | Page 16-17            |
| Interpretation           | 20  | Give a cautious overall interpretation of results considering objectives, limitations, multiplicity of analyses, results from similar studies, and other relevant evidence                                                                                                                                                                                                                                    | Page 15-16            |
| Generalisability         | 21  | Discuss the generalisability (external validity) of the study results                                                                                                                                                                                                                                                                                                                                         | Page 17               |
| <b>Other information</b> |     |                                                                                                                                                                                                                                                                                                                                                                                                               | Page 18-19            |
| Funding                  | 22  | Give the source of funding and the role of the funders for the present study and, if applicable, for the original study on which the present article is based                                                                                                                                                                                                                                                 | Page 18               |

\*Give information separately for cases and controls in case-control studies and, if applicable, for exposed and unexposed groups in cohort and cross-sectional studies.

**Note:** An Explanation and Elaboration article discusses each checklist item and gives methodological background and published examples of transparent reporting. The STROBE checklist is best used in conjunction with this article (freely available on the Web sites of PLoS Medicine at <http://www.plosmedicine.org/>, Annals of Internal Medicine at <http://www.annals.org/>, and Epidemiology at <http://www.epidem.com/>). Information on the STROBE Initiative is available at [www.strobe-statement.org](http://www.strobe-statement.org).
